# Supplementary material
Source: publisher site journal article supplement (https://www.dovepress.com/article/608897)

**Supplementary Materials**

**Supplementary Table 1 – Disease definitions**

| Code | Description | ICD version |
| --- | --- | --- |
| Bipolar disorder | | |
| F31 | Bipolar disorder | ICD-10 |
| F31.0 | Bipolar disorder, current episode hypomanic | ICD-10 |
| F31.1 | Bipolar disorder, current episode manic without psychotic features | ICD-10 |
| F31.10 | Bipolar disorder, current episode manic without psychotic features, unspecified | ICD-10 |
| F31.11 | Bipolar disorder, current episode manic without psychotic features, mild | ICD-10 |
| F31.12 | Bipolar disorder, current episode manic without psychotic features, moderate | ICD-10 |
| F31.13 | Bipolar disorder, current episode manic without psychotic features, severe | ICD-10 |
| F31.2 | Bipolar disorder, current episode manic severe with psychotic features | ICD-10 |
| F31.3 | Bipolar disorder, current episode depressed, mild or moderate severity | ICD-10 |
| F31.30 | Bipolar disorder, current episode depressed, mild or moderate severity, unspecified | ICD-10 |
| F31.31 | Bipolar disorder, current episode depressed, mild or moderate severity, mild | ICD-10 |
| F31.32 | Bipolar disorder, current episode depressed, mild or moderate severity, moderate | ICD-10 |
| F31.4 | Bipolar disorder, current episode depressed, severe, without psychotic features | ICD-10 |
| F31.5 | Bipolar disorder, current episode depressed, severe, with psychotic features | ICD-10 |
| F31.6 | Bipolar disorder, current episode mixed | ICD-10 |
| F31.60 | Bipolar disorder, current episode mixed, unspecified | ICD-10 |
| F31.61 | Bipolar disorder, current episode mixed, mild | ICD-10 |
| F31.62 | Bipolar disorder, current episode mixed, moderate | ICD-10 |
| F31.63 | Bipolar disorder, current episode mixed, severe, without psychotic features | ICD-10 |
| F31.64 | Bipolar disorder, current episode mixed, severe, with psychotic features | ICD-10 |
| F31.7 | Bipolar disorder, currently in remission | ICD-10 |
| F31.70 | Bipolar disorder, currently in remission, most recent episode unspecified | ICD-10 |
| F31.71 | Bipolar disorder, in partial remission, most recent episode hypomanic | ICD-10 |
| F31.72 | Bipolar disorder, in full remission, most recent episode hypomanic | ICD-10 |
| F31.73 | Bipolar disorder, in partial remission, most recent episode manic | ICD-10 |
| F31.74 | Bipolar disorder, in full remission, most recent episode manic | ICD-10 |
| F31.75 | Bipolar disorder, in partial remission, most recent episode depressed | ICD-10 |
| F31.76 | Bipolar disorder, in full remission, most recent episode depressed | ICD-10 |
| F31.77 | Bipolar disorder, in partial remission, most recent episode mixed | ICD-10 |
| F31.78 | Bipolar disorder, in full remission, most recent episode mixed | ICD-10 |
| F31.8 | Other bipolar disorders | ICD-10 |
| F31.81 | Bipolar II disorder | ICD-10 |
| F31.89 | Other bipolar disorder | ICD-10 |
| F31.9 | Bipolar disorder, unspecified | ICD-10 |
| 296.0 | Bipolar I disorder, single manic episode | ICD-9 |
| 296.00 | Bipolar I disorder, single manic episode, unspecified | ICD-9 |
| 296.01 | Bipolar I disorder, single manic episode, mild | ICD-9 |
| 296.02 | Bipolar I disorder, single manic episode, moderate | ICD-9 |
| 296.03 | Bipolar I disorder, single manic episode, severe, without mention of psychotic behavior | ICD-9 |
| 296.04 | Bipolar I disorder, single manic episode, severe, specified as with psychotic behavior | ICD-9 |
| 296.05 | Bipolar I disorder, single manic episode, in partial or unspecified remission | ICD-9 |
| 296.06 | Bipolar I disorder, single manic episode, in full remission | ICD-9 |
| 296.4 | Bipolar I disorder, most recent episode (or current) manic | ICD-9 |
| 296.40 | Bipolar I disorder, most recent episode (or current) manic, unspecified | ICD-9 |
| 296.41 | Bipolar I disorder, most recent episode (or current) manic, mild | ICD-9 |
| 296.42 | Bipolar I disorder, most recent episode (or current) manic, moderate | ICD-9 |
| 296.43 | Bipolar I disorder, most recent episode (or current) manic, severe, without mention of psychotic behavior | ICD-9 |
| 296.44 | Bipolar I disorder, most recent episode (or current) manic, severe, specified as with psychotic behavior | ICD-9 |
| 296.45 | Bipolar I disorder, most recent episode (or current) manic, severe, in partial or unspecified remission | ICD-9 |
| 296.46 | Bipolar I disorder, most recent episode (or current) manic, severe, in full remission | ICD-9 |
| 296.5 | Bipolar I disorder, most recent episode (or current) depressed | ICD-9 |
| 296.50 | Bipolar I disorder, most recent episode (or current) depressed, unspecified | ICD-9 |
| 296.51 | Bipolar I disorder, most recent episode (or current) depressed, mild | ICD-9 |
| 296.52 | Bipolar I disorder, most recent episode (or current) depressed, moderate | ICD-9 |
| 296.53 | Bipolar I disorder, most recent episode (or current) depressed, severe, without mention of psychotic behavior | ICD-9 |
| 296.54 | Bipolar I disorder, most recent episode (or current) depressed, severe, specified as with psychotic behavior | ICD-9 |
| 296.55 | Bipolar I disorder, most recent episode (or current) depressed, severe, in partial or unspecified remission | ICD-9 |
| 296.56 | Bipolar I disorder, most recent episode (or current) depressed, severe, in full remission | ICD-9 |
| 296.6 | Bipolar I disorder, most recent episode (or current) mixed | ICD-9 |
| 296.60 | Bipolar I disorder, most recent episode (or current) mixed, unspecified | ICD-9 |
| 296.61 | Bipolar I disorder, most recent episode (or current) mixed, mild | ICD-9 |
| 296.62 | Bipolar I disorder, most recent episode (or current) mixed, moderate | ICD-9 |
| 296.63 | Bipolar I disorder, most recent episode (or current) mixed, severe, without mention of psychotic behavior | ICD-9 |
| 296.64 | Bipolar I disorder, most recent episode (or current) mixed, severe, specified as with psychotic behavior | ICD-9 |
| 296.65 | Bipolar I disorder, most recent episode (or current) mixed, in partial or unspecified remission | ICD-9 |
| 296.66 | Bipolar I disorder, most recent episode (or current) mixed, in full remission | ICD-9 |
| 296.7 | Bipolar I disorder, most recent episode (or current) unspecified | ICD-9 |
| 296.8 | Other and unspecified bipolar disorders | ICD-9 |
| 296.80 | Bipolar disorder, unspecified | ICD-9 |
| 296.81 | Other and unspecified bipolar disorders; atypical manic disorder | ICD-9 |
| 296.89 | Other bipolar disorders; includes bipolar II | ICD-9 |
| Borderline personality disorder | | |
| F60.3 | Borderline personality disorder | ICD-10 |
| 301.83 | Borderline personality disorder | ICD-9 |
| Delusional disorders | | |
| F22 | Persistent delusional disorders | ICD-10 |
| F22.0 | Delusional disorder | ICD-10 |
| F22.8 | Other persistent delusional disorders | ICD-10 |
| F22.9 | Persistent delusional disorder, unspecified | ICD-10 |
| 297 | Delusional disorders | ICD-9 |
| 297.0 | Delusional disorder, paranoid state, simple | ICD-9 |
| 297.1 | Delusional disorder | ICD-9 |
| 297.2 | Paraphrenia | ICD-9 |
| 297.8 | Other specified paranoid states | ICD-9 |
| Dementia | | |
| F00 | Dementia in Alzheimer disease | ICD-10 |
| F01 | Vascular dementia | ICD-10 |
| F01.A | Vascular dementia, mild | ICD-10 |
| F01.A0 | Vascular dementia, mild, without behavioral disturbance, psychotic disturbance, mood disturbance, and anxiety | ICD-10 |
| F01.A1 | Vascular dementia, mild, with behavioral disturbance | ICD-10 |
| F01.A11 | Vascular dementia, mild, with agitation | ICD-10 |
| F01.A18 | Vascular dementia, mild, with other behavioral disturbance | ICD-10 |
| F01.A2 | Vascular dementia, mild, with psychotic disturbance | ICD-10 |
| F01.A3 | Vascular dementia, mild, with mood disturbance | ICD-10 |
| F01.A4 | Vascular dementia, mild, with anxiety | ICD-10 |
| F01.B | Vascular dementia, moderate | ICD-10 |
| F01.B0 | Vascular dementia, moderate, without behavioral disturbance, psychotic disturbance, mood disturbance, and anxiety | ICD-10 |
| F01.B1 | Vascular dementia, moderate, with behavioral disturbance | ICD-10 |
| F01.B11 | Vascular dementia, moderate, with agitation | ICD-10 |
| F01.B18 | Vascular dementia, moderate, with other behavioral disturbance | ICD-10 |
| F01.B2 | Vascular dementia, moderate, with other behavioral disturbance | ICD-10 |
| F01.B3 | Vascular dementia, moderate, with mood disturbance | ICD-10 |
| F01.B4 | Vascular dementia, moderate, with anxiety | ICD-10 |
| F01.C | Vascular dementia, severe | ICD-10 |
| F01.C0 | Vascular dementia, severe, without behavioral disturbance, psychotic disturbance, mood disturbance, and anxiety | ICD-10 |
| F01.C1 | Vascular dementia, severe, with behavioral disturbance | ICD-10 |
| F01.C11 | Vascular dementia, severe, with agitation | ICD-10 |
| F01.C18 | Vascular dementia, severe, with other behavioral disturbance | ICD-10 |
| F01.C2 | Vascular dementia, severe, with other behavioral disturbance | ICD-10 |
| F01.C3 | Vascular dementia, severe, with mood disturbance | ICD-10 |
| F01.C4 | Vascular dementia, severe, with anxiety | ICD-10 |
| F02 | Dementia in other diseases classified elsewhere | ICD-10 |
| F02.A | Dementia in other diseases classified elsewhere, mild | ICD-10 |
| F02.A0 | Dementia in other diseases classified elsewhere, mild, without behavioral disturbance, psychotic disturbance, mood disturbance, and anxiety | ICD-10 |
| F02.A1 | Dementia in other diseases classified elsewhere, mild, with behavioral disturbance | ICD-10 |
| F02.A11 | Dementia in other diseases classified elsewhere, mild, with agitation | ICD-10 |
| F02.A18 | Dementia in other diseases classified elsewhere, mild, with other behavioral disturbance | ICD-10 |
| F02.A2 | Dementia in other diseases classified elsewhere, mild, with psychotic disturbance | ICD-10 |
| F02.A3 | Dementia in other diseases classified elsewhere, mild, with mood disturbance | ICD-10 |
| F02.A4 | Dementia in other diseases classified elsewhere, mild, with anxiety | ICD-10 |
| F02.B | Dementia in other diseases classified elsewhere, moderate | ICD-10 |
| F02.B0 | Dementia in other diseases classified elsewhere, moderate, without behavioral disturbance, psychotic disturbance, mood disturbance, and anxiety | ICD-10 |
| F02.B1 | Dementia in other diseases classified elsewhere, moderate, with behavioral disturbance | ICD-10 |
| F02.B11 | Dementia in other diseases classified elsewhere, moderate, with agitation | ICD-10 |
| F02.B18 | Dementia in other diseases classified elsewhere, moderate, with other behavioral disturbance | ICD-10 |
| F02.B2 | Dementia in other diseases classified elsewhere, moderate, with other behavioral disturbance | ICD-10 |
| F02.B3 | Dementia in other diseases classified elsewhere, moderate, with mood disturbance | ICD-10 |
| F02.B4 | Dementia in other diseases classified elsewhere, moderate, with anxiety | ICD-10 |
| F02.C | Dementia in other diseases classified elsewhere, severe | ICD-10 |
| F02.C0 | Dementia in other diseases classified elsewhere, severe, without behavioral disturbance, psychotic disturbance, mood disturbance, and anxiety | ICD-10 |
| F02.C1 | Dementia in other diseases classified elsewhere, severe, with behavioral disturbance | ICD-10 |
| F02.C11 | Dementia in other diseases classified elsewhere, severe, with agitation | ICD-10 |
| F02.C18 | Dementia in other diseases classified elsewhere, severe, with other behavioral disturbance | ICD-10 |
| F02.C2 | Dementia in other diseases classified elsewhere, severe, with other behavioral disturbance | ICD-10 |
| F02.C3 | Dementia in other diseases classified elsewhere, severe, with mood disturbance | ICD-10 |
| F02.C4 | Dementia in other diseases classified elsewhere, severe, with anxiety | ICD-10 |
| F03 | Unspecified dementia | ICD-10 |
| F03.A | Unspecified dementia, mild | ICD-10 |
| F03.A0 | Unspecified dementia, mild, without behavioral disturbance, psychotic disturbance, mood disturbance, and anxiety | ICD-10 |
| F03.A1 | Unspecified dementia, mild, with behavioral disturbance | ICD-10 |
| F03.A11 | Unspecified dementia, mild, with agitation | ICD-10 |
| F03.A18 | Unspecified dementia, mild, with other behavioral disturbance | ICD-10 |
| F03.A2 | Unspecified dementia, mild, with psychotic disturbance | ICD-10 |
| F03.A3 | Unspecified dementia, mild, with mood disturbance | ICD-10 |
| F03.A4 | Unspecified dementia, mild, with anxiety | ICD-10 |
| F03.B | Unspecified dementia, moderate | ICD-10 |
| F03.B0 | Unspecified dementia, moderate, without behavioral disturbance, psychotic disturbance, mood disturbance, and anxiety | ICD-10 |
| F03.B1 | Unspecified dementia, moderate, with behavioral disturbance | ICD-10 |
| F03.B11 | Unspecified dementia, moderate, with agitation | ICD-10 |
| F03.B18 | Unspecified dementia, moderate, with other behavioral disturbance | ICD-10 |
| F03.B2 | Unspecified dementia, moderate, with other behavioral disturbance | ICD-10 |
| F03.B3 | Unspecified dementia, moderate, with mood disturbance | ICD-10 |
| F03.B4 | Unspecified dementia, moderate, with anxiety | ICD-10 |
| F03.C | Unspecified dementia, severe | ICD-10 |
| F03.C0 | Unspecified dementia, severe, without behavioral disturbance, psychotic disturbance, mood disturbance, and anxiety | ICD-10 |
| F03.C1 | Unspecified dementia, severe, with behavioral disturbance | ICD-10 |
| F03.C11 | Unspecified dementia, severe, with agitation | ICD-10 |
| F03.C18 | Unspecified dementia, severe, with other behavioral disturbance | ICD-10 |
| F03.C2 | Unspecified dementia, severe, with other behavioral disturbance | ICD-10 |
| F03.C3 | Unspecified dementia, severe, with mood disturbance | ICD-10 |
| F03.C4 | Unspecified dementia, severe, with anxiety | ICD-10 |
| G30 | Alzheimer disease | ICD-10 |
| F00.0 | Dementia in Alzheimer disease with early onset | ICD-10 |
| F01.0 | Vascular dementia of acute onset | ICD-10 |
| F02.0 | Dementia in Pick disease | ICD-10 |
| G30.0 | Alzheimer disease with early onset | ICD-10 |
| G31.0 | Circumscribed brain atrophy (frontotemporal dementia, Pick disease, progressive isolated aphasia) | ICD-10 |
| G31.01 | Pick's disease | ICD-10 |
| G31.09 | Other frontotemporal neurocognitive disorder | ICD-10 |
| F00.1 | Dementia in Alzheimer disease with late onset | ICD-10 |
| F01.1 | Multi-infarct dementia | ICD-10 |
| F02.1 | Dementia in Creutzfeldt-Jakob disease | ICD-10 |
| G30.1 | Alzheimer disease with late onset | ICD-10 |
| G31.1 | Senile degeneration of brain, not elsewhere classified | ICD-10 |
| F19.17 | Other psychoactive substance abuse with psychoactive substance-induced persisting dementia | ICD-10 |
| F18.17 | Inhalant abuse with inhalant-induced dementia | ICD-10 |
| F00.2 | Dementia in Alzheimer disease, atypical or mixed type | ICD-10 |
| F01.2 | Subcortical vascular dementia | ICD-10 |
| F02.2 | Dementia in Huntington disease | ICD-10 |
| G31.2 | Degeneration of nervous system due to alcohol | ICD-10 |
| F13.27 | Sedative, hypnotic or anxiolytic dependence with sedative, hypnotic or anxiolytic-induced persisting dementia | ICD-10 |
| F19.27 | Other psychoactive substance dependence with psychoactive substance-induced persisting dementia | ICD-10 |
| F18.27 | Inhalant dependence with inhalant-induced dementia | ICD-10 |
| F10.27 | Alcohol dependence with alcohol-induced persisting dementia | ICD-10 |
| F01.3 | Mixed cortical and subcortical vascular dementia | ICD-10 |
| F02.3 | Dementia in Parkinson disease | ICD-10 |
| F02.4 | Dementia in human immunodeficiency virus [HIV] disease | ICD-10 |
| F01.5 | Vascular dementia, unspecified severity | ICD-10 |
| F01.50 | Vascular dementia, unspecified severity, without behavioral disturbance, psychotic disturbance, mood disturbance, and anxiety | ICD-10 |
| F01.51 | Vascular dementia, unspecified severity, with behavioral disturbance | ICD-10 |
| F01.511 | Vascular dementia, unspecified severity, with agitation | ICD-10 |
| F01.518 | Vascular dementia, unspecified severity, with other behavioral disturbance | ICD-10 |
| F01.52 | Vascular dementia, unspecified severity, with psychotic disturbance | ICD-10 |
| F01.53 | Vascular dementia, unspecified severity, with mood disturbance | ICD-10 |
| F01.54 | Vascular dementia, unspecified severity, with anxiety | ICD-10 |
| F01.8 | Other vascular dementia | ICD-10 |
| F02.8 | Dementia in other specified diseases classified elsewhere | ICD-10 |
| F02.80 | Dementia in other diseases classified elsewhere without behavioral disturbance | ICD-10 |
| G30.8 | Other Alzheimer disease | ICD-10 |
| G31.8 | Other specified degenerative diseases of nervous system (inc. Lewy body dementia) | ICD-10 |
| G31.80 | Leukodystrophy, unspecified | ICD-10 |
| F02.81 | Dementia in other diseases classified elsewhere with behavioral disturbance | ICD-10 |
| G31.81 | Alpers disease | ICD-10 |
| F02.811 | Dementia in other diseases classified elsewhere, unspecified severity, with agitation | ICD-10 |
| F02.818 | Dementia in other diseases classified elsewhere, unspecified severity, with other behavioral disturbance | ICD-10 |
| F02.82 | Dementia in other diseases classified elsewhere, unspecified severity, with psychotic disturbance | ICD-10 |
| G31.82 | Leigh’s disease | ICD-10 |
| F02.83 | Dementia in other diseases classified elsewhere, unspecified severity, with mood disturbance | ICD-10 |
| G31.83 | [Neurocognitive disorder with Lewy bodies](https://www.icd10data.com/ICD10CM/Codes/G00-G99/G30-G32/G31-/G31.83) | ICD-10 |
| F02.84 | Dementia in other diseases classified elsewhere, unspecified severity, with anxiety | ICD-10 |
| G31.84 | [Mild cognitive impairment of uncertain or unknown etiology](https://www.icd10data.com/ICD10CM/Codes/G00-G99/G30-G32/G31-/G31.84) | ICD-10 |
| G31.85 | [Corticobasal degeneration](https://www.icd10data.com/ICD10CM/Codes/G00-G99/G30-G32/G31-/G31.85) | ICD-10 |
| G31.86 | [Alexander disease](https://www.icd10data.com/ICD10CM/Codes/G00-G99/G30-G32/G31-/G31.86) | ICD-10 |
| F00.9 | Dementia in Alzheimer disease, unspecified | ICD-10 |
| F01.9 | Vascular dementia, unspecified | ICD-10 |
| F03.9 | Unspecified dementia, unspecified severity | ICD-10 |
| F03.90 | Unspecified dementia, unspecified severity, without behavioral disturbance, psychotic disturbance, mood disturbance, and anxiety | ICD-10 |
| G30.9 | Alzheimer disease, unspecified | ICD-10 |
| G31.9 | [Degenerative disease of nervous system, unspecified](https://www.icd10data.com/ICD10CM/Codes/G00-G99/G30-G32/G31-/G31.9) | ICD-10 |
| F03.91 | Unspecified dementia, unspecified severity, with behavioral disturbance | ICD-10 |
| F03.911 | Unspecified dementia, unspecified severity, with agitation | ICD-10 |
| F03.918 | Unspecified dementia, unspecified severity, with other behavioral disturbance | ICD-10 |
| F03.92 | Unspecified dementia, unspecified severity, with psychotic disturbance | ICD-10 |
| F03.93 | Unspecified dementia, unspecified severity, with mood disturbance | ICD-10 |
| F03.94 | Unspecified dementia, unspecified severity, with anxiety | ICD-10 |
| F13.97 | Sedative, hypnotic or anxiolytic use, unspecified with sedative, hypnotic or anxiolytic-induced persisting dementia | ICD-10 |
| F19.97 | Other psychoactive substance use, unspecified with psychoactive substance-induced persisting dementia | ICD-10 |
| F18.97 | Inhalant use, unspecified with inhalant-induced persisting dementia | ICD-10 |
| F10.97 | Alcohol use, unspecified with alcohol-induced persisting dementia | ICD-10 |
| 290 | Dementias | ICD-9 |
| 290.0 | Senile dementia, uncomplicated | ICD-9 |
| 290.1 | Presenile dementia | ICD-9 |
| 290.10 | Presenile dementia, uncomplicated | ICD-9 |
| 290.11 | Presenile dementia with delirium | ICD-9 |
| 290.12 | Presenile dementia with delusional features | ICD-9 |
| 290.13 | Presenile dementia with depressive features | ICD-9 |
| 290.2 | Senile dementia with delusional or depressive features | ICD-9 |
| 290.20 | Senile dementia with delusional features | ICD-9 |
| 290.21 | Senile dementia with depressive features | ICD-9 |
| 290.3 | Senile dementia with delirium | ICD-9 |
| 290.4 | Vascular dementia | ICD-9 |
| 290.40 | Vascular dementia, uncomplicated | ICD-9 |
| 290.41 | Vascular dementia, with delirium | ICD-9 |
| 290.42 | Vascular dementia, with delusions | ICD-9 |
| 290.43 | Vascular dementia, with depressed mood | ICD-9 |
| 290.8 | Other specified senile psychotic conditions | ICD-9 |
| 290.9 | Unspecified senile psychotic condition | ICD-9 |
| 291.2 | Alcohol-induced persisting dementia | ICD-9 |
| 292.82 | Drug-induced persisting dementia | ICD-9 |
| 294.1 | Dementia in conditions classified elsewhere | ICD-9 |
| 294.10 | Dementia in conditions classified elsewhere without behavioral disturbance | ICD-9 |
| 294.11 | Dementia in conditions classified elsewhere with behavioral disturbance | ICD-9 |
| 294.2 | Dementia, unspecified | ICD-9 |
| 294.20 | Dementia, unspecified, without behavioral disturbance | ICD-9 |
| 294.21 | Dementia, unspecified, with behavioral disturbance | ICD-9 |
| 310.0 | Frontal lobe syndrome | ICD-9 |
| 331 | Other cerebral degenerations | ICD-9 |
| 331.0 | Alzheimer's disease | ICD-9 |
| 331.1 | Frontotemporal dementia | ICD-9 |
| 331.11 | Pick's disease | ICD-9 |
| 331.19 | Frontotemporal dementia NEC | ICD-9 |
| 331.2 | Senile degeneration of the brain | ICD-9 |
| 331.6 | Corticobasal degeneration | ICD-9 |
| 331.7 | Corticobasal degeneration in diseases elsewhere classified | ICD-9 |
| 331.8 | Other cerebral degeneration | ICD-9 |
| 331.81 | Reye's syndrome | ICD-9 |
| 331.82 | Dementia with Lewy bodies | ICD-9 |
| 331.83 | Mild cognitive impairment, so stated | ICD-9 |
| 331.89 | Other cerebral degeneration | ICD-9 |
| 331.9 | Cerebral degeneration, unspecified | ICD-9 |
| Eating disorders | | |  |  |
| F50 | Eating disorders | ICD-10 |
| F50.0 | Anorexia nervosa | ICD-10 |
| F50.00 | Anorexia nervosa, unspecified | ICD-10 |
| F50.01 | Anorexia nervosa, restricting type | ICD-10 |
| F50.02 | Anorexia nervosa, binge eating/purging type | ICD-10 |
| F50.1 | Anorexia nervosa, atypical | ICD-10 |
| F50.2 | Bulimia nervosa | ICD-10 |
| F50.3 | Bulimia nervosa, atypical | ICD-10 |
| F50.4 | Overeating associated with other psychological disturbances | ICD-10 |
| F50.8 | Other eating disorders | ICD-10 |
| F50.81 | Binge-eating disorder | ICD-10 |
| F50.82 | Avoidant/restrictive food intake disorder | ICD-10 |
| F50.89 | Other specified eating disorder | ICD-10 |
| F50.9 | Eating disorder, unspecified | ICD-10 |
| 307.1 | Anorexia nervosa | ICD-9 |
| 307.5 | Other and unspecified disorders of eating | ICD-9 |
| 307.50 | Eating disorder, unspecified | ICD-9 |
| 307.51 | Bulimia nervosa | ICD-9 |
| 307.52 | Pica | ICD-9 |
| 307.54 | Psychogenic vomiting | ICD-9 |
| 307.59 | Other disorders of eating | ICD-9 |
| Intellectual disability | | |
| F70 | Mild mental retardation | ICD-10 |
| F70.0 | Mild mental retardation with no, or minimal, impairment of behavior | ICD-10 |
| F70.1 | Mild mental retardation with no, or with significant impairment of behavior requiring attention or treatment | ICD-10 |
| F70.8 | Mild mental retardation with other impairments of behavior | ICD-10 |
| F70.9 | Mild mental retardation without mention of impairment of behavior | ICD-10 |
| F71 | Moderate mental retardation | ICD-10 |
| F71.0 | Moderate mental retardation with no, or minimal, impairment of behavior | ICD-10 |
| F71.1 | Moderate mental retardation with no, or with significant impairment of behavior requiring attention or treatment | ICD-10 |
| F71.8 | Moderate mental retardation with other impairments of behavior | ICD-10 |
| F71.9 | Moderate mental retardation without mention of impairment of behavior | ICD-10 |
| F72 | Severe mental retardation | ICD-10 |
| F72.0 | Severe mental retardation with no, or minimal, impairment of behavior | ICD-10 |
| F72.1 | Severe mental retardation with no, or with significant impairment of behavior requiring attention or treatment | ICD-10 |
| F72.8 | Severe mental retardation with other impairments of behavior | ICD-10 |
| F72.9 | Severe mental retardation without mention of impairment of behavior | ICD-10 |
| F73 | Profound mental retardation | ICD-10 |
| F73.0 | Profound mental retardation with no, or minimal, impairment of behavior | ICD-10 |
| F73.1 | Profound mental retardation with no, or with significant impairment of behavior requiring attention or treatment | ICD-10 |
| F73.8 | Profound mental retardation with other impairments of behavior | ICD-10 |
| F73.9 | Profound mental retardation without mention of impairment of behavior | ICD-10 |
| F78 | Other mental retardation | ICD-10 |
| F78.0 | Other mental retardation with no, or minimal, impairment of behavior | ICD-10 |
| F78.1 | Other mental retardation with no, or with significant impairment of behavior requiring attention or treatment | ICD-10 |
| F78.8 | Other mental retardation with other impairments of behavior | ICD-10 |
| F78.9 | Other mental retardation without mention of impairment of behavior | ICD-10 |
| F79 | Unspecified mental retardation | ICD-10 |
| F79.0 | Unspecified mental retardation with no, or minimal, impairment of behavior | ICD-10 |
| F79.1 | Unspecified mental retardation with no, or with significant impairment of behavior requiring attention or treatment | ICD-10 |
| F79.8 | Unspecified mental retardation with other impairments of behavior | ICD-10 |
| F79.9 | Unspecified mental retardation without mention of impairment of behavior | ICD-10 |
| 317 | Mild mental retardation | ICD-9 |
| 318 | Other specified mental retardation | ICD-9 |
| 318.0 | Moderate mental retardation | ICD-9 |
| 318.1 | Severe mental retardation | ICD-9 |
| 318.2 | Profound mental retardation | ICD-9 |
| 319 | Unspecified intellectual disabilities | ICD-9 |
| Other mood disorders (depressive & mania) | | |
| F30 | Manic episode | ICD-10 |
| F30.1 | Mania without psychotic symptoms | ICD-10 |
| F30.2 | Mania with psychotic symptoms | ICD-10 |
| F30.8 | Other manic episodes | ICD-10 |
| F30.9 | Manic episode, unspecified | ICD-10 |
| F34 | Persistent mood (affective) disorder | ICD-10 |
| F34.0 | Cyclothymia | ICD-10 |
| F34.8 | Other persistent mood (affective) disorder | ICD-10 |
| F34.9 | Persistent mood (affective) disorder, unspecified | ICD-10 |
| F38 | Other mood (affective) disorder | ICD-10 |
| F38.0 | Other single mood (affective) disorder | ICD-10 |
| F38.1 | Other recurrent mood (affective) disorder | ICD-10 |
| F38.8 | Other specified mood (affective) disorder | ICD-10 |
| F39 | Unspecified mood (affective) disorder | ICD-10 |
| 296.1 | Manic disorder, recurrent episode | ICD-9 |
| 296.10 | Manic affective disorder, recurrent episode, unspecified | ICD-9 |
| 296.10 | Manic affective disorder, recurrent episode, unspecified | ICD-9 |
| 296.11 | Manic affective disorder, recurrent episode, mild | ICD-9 |
| 296.12 | Manic affective disorder, recurrent episode, moderate | ICD-9 |
| 296.13 | Manic affective disorder, recurrent episode, severe, without psychotic behavior | ICD-9 |
| 296.14 | Manic affective disorder, recurrent episode, severe, with psychotic behavior | ICD-9 |
| 296.15 | Manic affective disorder, recurrent episode, in partial or unspecified remission | ICD-9 |
| 296.16 | Manic affective disorder, recurrent episode, in full remission | ICD-9 |
| 296.81 | Atypical manic disorder | ICD-9 |
| 296.9 | Other and unspecified episodic mood disorder | ICD-9 |
| 296.90 | Unspecified episodic mood disorder | ICD-9 |
| 296.99 | Other specified episodic mood disorder | ICD-9 |
| 301.13 | Cyclothymic disorder | ICD-9 |
| Other psychotic disorders | | |  |
| F23 | Brief psychotic disorder | ICD-10 |
| F24 | Shared psychotic disorder | ICD-10 |
| F28 | Other psychotic disorder not due to a substance or known physiological condition | ICD-10 |
| F29 | Unspecified psychosis not due to a substance or known physiological condition | ICD-10 |
| 297.3 | Shared psychotic disorder | ICD-9 |
| 297.9 | Unspecified paranoid state | ICD-9 |
| 298 | Other nonorganic psychoses | ICD-9 |
| 298.0 | Other nonorganic psychoses, depressive type psychosis | ICD-9 |
| 298.1 | Other nonorganic psychoses, excitative type psychosis | ICD-9 |
| 298.2 | Other nonorganic psychoses, reactive confusion | ICD-9 |
| 298.3 | Other nonorganic psychoses, acute paranoid reaction | ICD-9 |
| 298.4 | Other nonorganic psychoses, psychogenic paranoid psychosis | ICD-9 |
| 298.8 | Other nonorganic psychoses, other and unspecified reactive psychosis | ICD-9 |
| 298.9 | Other nonorganic psychoses, unspecified psychosis | ICD-9 |
| Pervasive and specific developmental disorders | | |
| F80 | Specific developmental disorders of speech and language | ICD-10 |
| F81 | Specific developmental disorders of scholastic skills | ICD-10 |
| F82 | Specific developmental disorder of motor function | ICD-10 |
| F83 | Mixed specific developmental disorders | ICD-10 |
| F84 | Pervasive developmental disorders | ICD-10 |
| F88 | Other disorders of psychological development | ICD-10 |
| F89 | Unspecified disorder of psychological development | ICD-10 |
| F80.0 | Phonological disorder | ICD-10 |
| F81.0 | Specific reading disorder | ICD-10 |
| F84.0 | Childhood autism | ICD-10 |
| F80.1 | Expressive language disorder | ICD-10 |
| F84.1 | Atypical autism | ICD-10 |
| F80.2 | Mixed receptive-expressive language disorder | ICD-10 |
| F81.2 | Mathematics disorder | ICD-10 |
| F84.2 | Rett syndrome | ICD-10 |
| F84.3 | Other childhood disintegrative disorder | ICD-10 |
| F80.4 | Speech and language development delay due to hearing loss | ICD-10 |
| F84.5 | Asperger's syndrome | ICD-10 |
| F80.8 | Other developmental disorders of speech and language | ICD-10 |
| F81.8 | Other developmental disorders of scholastic skills | ICD-10 |
| F84.8 | Other pervasive developmental disorders | ICD-10 |
| F80.81 | Childhood onset fluency disorder | ICD-10 |
| F81.81 | Disorder or written expression | ICD-10 |
| F80.82 | Social pragmatic communication disorder | ICD-10 |
| F80.89 | Other developmental disorders of speech and language | ICD-10 |
| F81.89 | Other developmental disorders of scholastic skills | ICD-10 |
| F80.9 | Developmental disorder of speech and language, unspecified | ICD-10 |
| F81.9 | Developmental disorder of scholastic skills, unspecified | ICD-10 |
| F84.9 | Pervasive developmental disorder, unspecified | ICD-10 |
| 299 | Pervasive developmental disorder | ICD-9 |
| 299.0 | Autistic disorder | ICD-9 |
| 299.00 | Autistic disorder, current or active state | ICD-9 |
| 299.01 | Autistic disorder, residual state | ICD-9 |
| 299.1 | Childhood disintegrative disorder | ICD-9 |
| 299.10 | Childhood disintegrative disorder, current or active state | ICD-9 |
| 299.11 | Childhood disintegrative disorder, residual state | ICD-9 |
| 299.8 | Other specified pervasive developmental disorder | ICD-9 |
| 299.80 | Other specified pervasive developmental disorder, current or active state | ICD-9 |
| 299.81 | Other specified pervasive developmental disorder, residual state | ICD-9 |
| 299.9 | Unspecified pervasive developmental disorder | ICD-9 |
| 299.90 | Unspecified pervasive developmental disorder, current or active state | ICD-9 |
| 299.91 | Unspecified pervasive developmental disorder, residual state | ICD-9 |
| 315 | Specific delays in development | ICD-9 |
| 315.0 | Developmental reading disorder | ICD-9 |
| 315.00 | Developmental reading disorder, unspecified | ICD-9 |
| 315.01 | Alexia | ICD-9 |
| 315.02 | Development dyslexia | ICD-9 |
| 315.09 | Other specific developmental reading disorder | ICD-9 |
| 315.1 | Mathematics disorder | ICD-9 |
| 315.2 | Other specific developmental learning difficulties | ICD-9 |
| 315.3 | Developmental speech or language disorder | ICD-9 |
| 315.31 | Expressive language disorder | ICD-9 |
| 315.32 | Mixed receptive-expressive language disorder | ICD-9 |
| 315.34 | Speech and language developmental delay due to hearing loss | ICD-9 |
| 315.35 | Childhood onset fluency disorder | ICD-9 |
| 315.39 | Other developmental speech or language disorder | ICD-9 |
| 315.4 | Developmental coordination disorder | ICD-9 |
| 315.5 | Mixed development disorder | ICD-9 |
| 315.8 | Other specified delays in development | ICD-9 |
| 315.9 | Unspecified delay in development | ICD-9 |
| Schizoaffective disorder | | |  |
| F25 | Schizoaffective disorders | ICD-10 |
| F25.0 | Schizoaffective disorder, bipolar type | ICD-10 |
| F25.1 | Schizoaffective disorder, depressive type | ICD-10 |
| F25.2 | Schizoaffective disorder, mixed type | ICD-10 |
| F25.8 | Other schizoaffective disorders | ICD-10 |
| F25.9 | Schizoaffective disorder, unspecified | ICD-10 |
| 295.7 | Schizoaffective disorder | ICD-9 |
| 295.70 | Schizoaffective disorder, unspecified | ICD-9 |
| 295.71 | Schizoaffective disorder, subchronic | ICD-9 |
| 295.72 | Schizoaffective disorder, chronic | ICD-9 |
| 295.73 | Schizoaffective disorder, subchronic with acute exacerbation | ICD-9 |
| 295.74 | Schizoaffective disorder, chronic with acute exacerbation | ICD-9 |
| 295.75 | Schizoaffective disorder, in remission | ICD-9 |
| Schizophrenia | | |
| F20 | Schizophrenia | ICD-10 |
| F20.0 | Paranoid schizophrenia | ICD-10 |
| F20.1 | Disorganized schizophrenia | ICD-10 |
| F20.2 | Catatonic schizophrenia | ICD-10 |
| F20.3 | Undifferentiated schizophrenia | ICD-10 |
| F20.5 | Residual schizophrenia | ICD-10 |
| F20.8 | Other schizophrenia | ICD-10 |
| F20.89 | Other schizophrenia | ICD-10 |
| F20.9 | Schizophrenia, unspecified | ICD-10 |
| 295.0 | Simple type schizophrenia | ICD-9 |
| 295.00 | Simple type schizophrenia, unspecified | ICD-9 |
| 295.01 | Simple type schizophrenia, subchronic | ICD-9 |
| 295.02 | Simple type schizophrenia, chronic | ICD-9 |
| 295.03 | Simple type schizophrenia, subchronic with acute exacerbation | ICD-9 |
| 295.04 | Simple type schizophrenia, chronic with acute exacerbation | ICD-9 |
| 295.05 | Simple type schizophrenia, in remission | ICD-9 |
| 295.1 | Disorganized type schizophrenia | ICD-9 |
| 295.10 | Disorganized type schizophrenia, unspecified | ICD-9 |
| 295.11 | Disorganized type schizophrenia, subchronic | ICD-9 |
| 295.12 | Disorganized type schizophrenia, chronic | ICD-9 |
| 295.13 | Disorganized type schizophrenia, subchronic with acute exacerbation | ICD-9 |
| 295.14 | Disorganized type schizophrenia, chronic with acute exacerbation | ICD-9 |
| 295.15 | Disorganized type schizophrenia, in remission | ICD-9 |
| 295.2 | Catatonic type schizophrenia | ICD-9 |
| 295.20 | Catatonic type schizophrenia, unspecified | ICD-9 |
| 295.21 | Catatonic type schizophrenia, subchronic | ICD-9 |
| 295.22 | Catatonic type schizophrenia, chronic | ICD-9 |
| 295.23 | Catatonic type schizophrenia, subchronic with acute exacerbation | ICD-9 |
| 295.24 | Catatonic type schizophrenia, chronic with acute exacerbation | ICD-9 |
| 295.25 | Catatonic type schizophrenia, in remission | ICD-9 |
| 295.3 | Paranoid type schizophrenia | ICD-9 |
| 295.30 | Paranoid type schizophrenia, unspecified | ICD-9 |
| 295.31 | Paranoid type schizophrenia, subchronic | ICD-9 |
| 295.32 | Paranoid type schizophrenia, chronic | ICD-9 |
| 295.33 | Paranoid type schizophrenia, subchronic with acute exacerbation | ICD-9 |
| 295.34 | Paranoid type schizophrenia, chronic with acute exacerbation | ICD-9 |
| 295.35 | Paranoid type schizophrenia, in remission | ICD-9 |
| 295.5 | Latent schizophrenia | ICD-9 |
| 295.50 | Latent schizophrenia, unspecified | ICD-9 |
| 295.51 | Latent schizophrenia, subchronic | ICD-9 |
| 295.52 | Latent schizophrenia, chronic | ICD-9 |
| 295.53 | Latent schizophrenia, subchronic with acute exacerbation | ICD-9 |
| 295.54 | Latent schizophrenia, chronic with acute exacerbation | ICD-9 |
| 295.55 | Latent schizophrenia, in remission | ICD-9 |
| 295.6 | Residual type schizophrenic disorders | ICD-9 |
| 295.60 | Schizophrenic disorders, residual type, unspecified | ICD-9 |
| 295.61 | Schizophrenic disorders, residual type, subchronic | ICD-9 |
| 295.62 | Schizophrenic disorders, residual type, chronic | ICD-9 |
| 295.63 | Schizophrenic disorders, residual type, subchronic with acute exacerbation | ICD-9 |
| 295.64 | Schizophrenic disorders, residual type, chronic with acute exacerbation | ICD-9 |
| 295.65 | Schizophrenic disorders, residual type, in remission | ICD-9 |
| 295.8 | Other specified types of schizophrenia | ICD-9 |
| 295.80 | Other specified types of schizophrenia, unspecified | ICD-9 |
| 295.81 | Other specified types of schizophrenia, subchronic | ICD-9 |
| 295.82 | Other specified types of schizophrenia, chronic | ICD-9 |
| 295.83 | Other specified types of schizophrenia, subchronic with acute exacerbation | ICD-9 |
| 295.84 | Other specified types of schizophrenia, chronic with acute exacerbation | ICD-9 |
| 295.85 | Other specified types of schizophrenia, in remission | ICD-9 |
| 295.9 | Unspecified schizophrenia | ICD-9 |
| 295.90 | Unspecified schizophrenia, unspecified | ICD-9 |
| 295.91 | Unspecified schizophrenia, subchronic | ICD-9 |
| 295.92 | Unspecified schizophrenia, chronic | ICD-9 |
| 295.93 | Unspecified schizophrenia, subchronic with acute exacerbation | ICD-9 |
| 295.94 | Unspecified schizophrenia, chronic with acute exacerbation | ICD-9 |
| 295.95 | Unspecified schizophrenia, in remission | ICD-9 |
| Schizophreniform disorder | | |
| F20.81 | Schizophreniform disorder | ICD-10 |
| 295.4 | Schizophreniform disorder | ICD-9 |
| 295.40 | Schizophreniform disorder, unspecified | ICD-9 |
| 295.41 | Schizophreniform disorder, subchronic | ICD-9 |
| 295.42 | Schizophreniform disorder, chronic | ICD-9 |
| 295.43 | Schizophreniform disorder, subchronic with acute exacerbation | ICD-9 |
| 295.44 | Schizophreniform disorder, chronic with acute exacerbation | ICD-9 |
| 295.45 | Schizophreniform disorder, in remission | ICD-9 |
| Schizotypal and schizoid personality disorder | | |
| F21 | Schizotypal disorder | ICD-10 |
| F60.1 | Schizoid personality disorder | ICD-10 |
| 301.20 | Schizoid personality disorder, unspecified | ICD-9 |
| 301.22 | Schizotypal personality disorder | ICD-9 |
| Substance use disorder | | |
| Cannabis | | |
| F12 | Cannabis related disorders | ICD-10 |
| F12.1 | Cannabis abuse | ICD-10 |
| F12.10 | Cannabis abuse, uncomplicated | ICD-10 |
| F12.11 | Cannabis abuse, in remission | ICD-10 |
| F12.12 | Cannabis abuse with intoxication | ICD-10 |
| F12.120 | Cannabis abuse with intoxication, uncomplicated | ICD-10 |
| F12.121 | Cannabis abuse with intoxication delirium | ICD-10 |
| F12.122 | Cannabis abuse with intoxication with perceptual disturbance | ICD-10 |
| F12.129 | Cannabis abuse with intoxication, unspecified | ICD-10 |
| F12.13 | Cannabis abuse with withdrawal | ICD-10 |
| F12.15 | Cannabis abuse with psychotic disorder | ICD-10 |
| F12.150 | Cannabis abuse with psychotic disorder with delusions | ICD-10 |
| F12.151 | Cannabis abuse with psychotic disorder with hallucinations | ICD-10 |
| F12.159 | Cannabis abuse with psychotic disorder, unspecified | ICD-10 |
| F12.18 | Cannabis abuse with other cannabis-induced disorder | ICD-10 |
| F12.180 | Cannabis abuse with cannabis-induced anxiety disorder | ICD-10 |
| F12.188 | Cannabis abuse with other cannabis-induced disorder | ICD-10 |
| F12.19 | Cannabis abuse with unspecified cannabis-induced disorder | ICD-10 |
| F12.2 | Cannabis dependence | ICD-10 |
| F12.20 | Cannabis dependence, uncomplicated | ICD-10 |
| F12.21 | Cannabis dependence, in remission | ICD-10 |
| F12.22 | Cannabis dependence with intoxication | ICD-10 |
| F12.220 | Cannabis dependence with intoxication, uncomplicated | ICD-10 |
| F12.221 | Cannabis dependence with intoxication delirium | ICD-10 |
| F12.222 | Cannabis dependence with intoxication with perceptual disturbance | ICD-10 |
| F12.229 | Cannabis dependence with intoxication, unspecified | ICD-10 |
| F12.23 | Cannabis dependence with withdrawal | ICD-10 |
| F12.25 | Cannabis dependence with psychotic disorder | ICD-10 |
| F12.250 | Cannabis dependence with psychotic disorder with delusions | ICD-10 |
| F12.251 | Cannabis dependence with psychotic disorder with hallucinations | ICD-10 |
| F12.259 | Cannabis dependence with psychotic disorder, unspecified | ICD-10 |
| F12.28 | Cannabis dependence with other cannabis-induced disorder | ICD-10 |
| F12.280 | Cannabis dependence with cannabis-induced anxiety disorder | ICD-10 |
| F12.288 | Cannabis dependence with other cannabis-induced disorder | ICD-10 |
| F12.29 | Cannabis dependence with unspecified cannabis-induced disorder | ICD-10 |
| F12.9 | Cannabis use, unspecified | ICD-10 |
| F12.90 | Cannabis use, unspecified, uncomplicated | ICD-10 |
| F12.91 | Cannabis use, unspecified, in remission | ICD-10 |
| F12.92 | Cannabis use, unspecified with intoxication | ICD-10 |
| F12.920 | Cannabis use, unspecified with intoxication, uncomplicated | ICD-10 |
| F12.921 | Cannabis use, unspecified with intoxication delirium | ICD-10 |
| F12.922 | Cannabis use, unspecified with intoxication with perceptual disturbance | ICD-10 |
| F12.929 | Cannabis use, unspecified with intoxication, unspecified | ICD-10 |
| F12.93 | Cannabis use, unspecified with withdrawal | ICD-10 |
| F12.95 | Cannabis use, unspecified with psychotic disorder | ICD-10 |
| F12.950 | Cannabis use, unspecified with psychotic disorder with delusions | ICD-10 |
| F12.951 | Cannabis use, unspecified with psychotic disorder with hallucinations | ICD-10 |
| F12.959 | Cannabis use, unspecified with psychotic disorder, unspecified | ICD-10 |
| F12.98 | Cannabis use, unspecified with other cannabis-induced disorder | ICD-10 |
| F12.980 | Cannabis use, unspecified with anxiety disorder | ICD-10 |
| F12.988 | Cannabis use, unspecified with other cannabis-induced disorder | ICD-10 |
| F12.99 | Cannabis use, unspecified with unspecified cannabis-induced disorder | ICD-10 |
| 304.3 | Cannabis dependence | ICD-9 |
| 304.30 | Cannabis dependence, unspecified | ICD-9 |
| 304.31 | Cannabis dependence, continuous | ICD-9 |
| 304.32 | Cannabis dependence, episodic | ICD-9 |
| 304.33 | Cannabis dependence, in remission | ICD-9 |
| 305.2 | Cannabis abuse | ICD-9 |
| 305.20 | Cannabis abuse, unspecified | ICD-9 |
| 305.21 | Cannabis abuse, continuous | ICD-9 |
| 305.22 | Cannabis abuse, episodic | ICD-9 |
| 305.23 | Cannabis abuse, in remission | ICD-9 |
| Opioids | | |
| F11.1 | Opioid abuse | ICD-10 |
| F11.10 | Opioid abuse, uncomplicated | ICD-10 |
| F11.11 | Opioid abuse, in remission | ICD-10 |
| F11.12 | Opioid abuse with intoxication | ICD-10 |
| F11.120 | Opioid abuse with intoxication, uncomplicated | ICD-10 |
| F11.121 | Opioid abuse with intoxication delirium | ICD-10 |
| F11.122 | Opioid abuse with intoxication with perceptual disturbance | ICD-10 |
| F11.129 | Opioid abuse with intoxication, unspecified | ICD-10 |
| F11.13 | Opioid abuse with withdrawal | ICD-10 |
| F11.14 | Opioid abuse with opioid-induced mood disorder | ICD-10 |
| F11.15 | Opioid abuse with opioid-induced psychotic disorder | ICD-10 |
| F11.150 | Opioid abuse with opioid-induced psychotic disorder with delusions | ICD-10 |
| F11.151 | Opioid abuse with opioid-induced psychotic disorder with hallucinations | ICD-10 |
| F11.159 | Opioid abuse with opioid-induced psychotic disorder, unspecified | ICD-10 |
| F11.18 | Opioid abuse with other opioid-induced disorder | ICD-10 |
| F11.181 | Opioid abuse with opioid-induced sexual dysfunction | ICD-10 |
| F11.182 | Opioid abuse with opioid-induced sleep disorder | ICD-10 |
| F11.188 | Opioid abuse with other opioid-induced disorder | ICD-10 |
| F11.19 | Opioid abuse with unspecified opioid-induced disorder | ICD-10 |
| F11.2 | Opioid dependence | ICD-10 |
| F11.20 | Opioid dependence, uncomplicated | ICD-10 |
| F11.21 | Opioid dependence, in remission | ICD-10 |
| F11.22 | Opioid dependence with intoxication | ICD-10 |
| F11.220 | Opioid dependence with intoxication, uncomplicated | ICD-10 |
| F11.221 | Opioid dependence with intoxication delirium | ICD-10 |
| F11.222 | Opioid dependence with intoxication with perceptual disturbance | ICD-10 |
| F11.229 | Opioid dependence with intoxication, unspecified | ICD-10 |
| F11.23 | Opioid dependence with withdrawal | ICD-10 |
| F11.24 | Opioid dependence with opioid-induced mood disorder | ICD-10 |
| F11.25 | Opioid dependence with opioid-induced psychotic disorder | ICD-10 |
| F11.250 | Opioid dependence with opioid-induced psychotic disorder with delusions | ICD-10 |
| F11.251 | Opioid dependence with opioid-induced psychotic disorder with hallucinations | ICD-10 |
| F11.259 | Opioid dependence with opioid-induced psychotic disorder, unspecified | ICD-10 |
| F11.28 | Opioid dependence with other opioid-induced disorder | ICD-10 |
| F11.281 | Opioid dependence with opioid-induced sexual dysfunction | ICD-10 |
| F11.282 | Opioid dependence with opioid-induced sleep disorder | ICD-10 |
| F11.288 | Opioid dependence with other opioid-induced disorder | ICD-10 |
| F11.29 | Opioid dependence with unspecified opioid-induced disorder | ICD-10 |
| F11.9 | Opioid use, unspecified | ICD-10 |
| F11.90 | Opioid use, unspecified, uncomplicated | ICD-10 |
| F11.91 | Opioid use, unspecified, in remission | ICD-10 |
| F11.92 | Opioid use, unspecified with intoxication | ICD-10 |
| F11.920 | Opioid use, unspecified with intoxication, uncomplicated | ICD-10 |
| F11.921 | Opioid use, unspecified with intoxication delirium | ICD-10 |
| F11.922 | Opioid use, unspecified with intoxication with perceptual disturbance | ICD-10 |
| F11.929 | Opioid use, unspecified with intoxication, unspecified | ICD-10 |
| F11.93 | Opioid use, unspecified with withdrawal | ICD-10 |
| F11.94 | Opioid use, unspecified with opioid-induced mood disorder | ICD-10 |
| F11.95 | Opioid use, unspecified with opioid-induced psychotic disorder | ICD-10 |
| F11.950 | Opioid use, unspecified with opioid-induced psychotic disorder with delusions | ICD-10 |
| F11.951 | Opioid use, unspecified with opioid-induced psychotic disorder with hallucinations | ICD-10 |
| F11.959 | Opioid use, unspecified with opioid-induced psychotic disorder, unspecified | ICD-10 |
| F11.98 | Opioid use, unspecified with other specified opioid-induced disorder | ICD-10 |
| F11.981 | Opioid use, unspecified with opioid-induced sexual dysfunction | ICD-10 |
| F11.982 | Opioid use, unspecified with opioid-induced sleep disorder | ICD-10 |
| F11.988 | Opioid use, unspecified with other opioid-induced disorder | ICD-10 |
| F11.99 | Opioid use, unspecified with unspecified opioid-induced disorder | ICD-10 |
| 305.5 | Nondependent opioid abuse | ICD-9 |
| 305.50 | Opioid abuse, unspecified | ICD-9 |
| 305.51 | Opioid abuse, continuous | ICD-9 |
| 305.52 | Opioid abuse, episodic | ICD-9 |
| 305.53 | Opioid abuse, in remission | ICD-9 |
| Cocaine | | |
| F14 | Cocaine related disorders | ICD-10 |
| F14.1 | Cocaine abuse | ICD-10 |
| F14.10 | Cocaine abuse, uncomplicated | ICD-10 |
| F14.11 | Cocaine abuse, in remission | ICD-10 |
| F14.12 | Cocaine abuse with intoxication | ICD-10 |
| F14.120 | Cocaine abuse with intoxication, uncomplicated | ICD-10 |
| F14.121 | Cocaine abuse with intoxication with delirium | ICD-10 |
| F14.122 | Cocaine abuse with intoxication with perceptual disturbance | ICD-10 |
| F14.129 | Cocaine abuse with intoxication, unspecified | ICD-10 |
| F14.13 | Cocaine abuse, unspecified with withdrawal | ICD-10 |
| F14.14 | Cocaine abuse with cocaine-induced mood disorder | ICD-10 |
| F14.15 | Cocaine abuse with cocaine-induced psychotic disorder | ICD-10 |
| F14.150 | Cocaine abuse with cocaine-induced psychotic disorder with delusions | ICD-10 |
| F14.151 | Cocaine abuse with cocaine-induced psychotic disorder with hallucinations | ICD-10 |
| F14.159 | Cocaine abuse with cocaine-induced psychotic disorder, unspecified | ICD-10 |
| F14.18 | Cocaine abuse with other cocaine-induced disorder | ICD-10 |
| F14.180 | Cocaine abuse with cocaine-induced anxiety disorder | ICD-10 |
| F14.181 | Cocaine abuse with cocaine-induced sexual dysfunction | ICD-10 |
| F14.182 | Cocaine abuse with cocaine-induced sleep disorder | ICD-10 |
| F14.188 | Cocaine abuse with other cocaine-induced disorder | ICD-10 |
| F14.19 | Cocaine abuse with unspecified cocaine-induced disorder | ICD-10 |
| F14.2 | Cocaine dependence | ICD-10 |
| F14.20 | Cocaine dependence, uncomplicated | ICD-10 |
| F14.21 | Cocaine dependence, in remission | ICD-10 |
| F14.22 | Cocaine dependence with intoxication | ICD-10 |
| F14.220 | Cocaine dependence with intoxication, uncomplicated | ICD-10 |
| F14.221 | Cocaine dependence with intoxication delirium | ICD-10 |
| F14.222 | Cocaine dependence with intoxication with perceptual disturbance | ICD-10 |
| F14.229 | Cocaine dependence with intoxication, unspecified | ICD-10 |
| F14.23 | Cocaine dependence with withdrawal | ICD-10 |
| F14.24 | Cocaine dependence with cocaine-induced mood disorder | ICD-10 |
| F14.25 | Cocaine dependence with cocaine-induced psychotic disorder | ICD-10 |
| F14.250 | Cocaine dependence with cocaine-induced psychotic disorder with delusions | ICD-10 |
| F14.251 | Cocaine dependence with cocaine-induced psychotic disorder with hallucinations | ICD-10 |
| F14.259 | Cocaine dependence with cocaine-induced psychotic disorder, unspecified | ICD-10 |
| F14.28 | Cocaine dependence with other cocaine-induced disorder | ICD-10 |
| F14.280 | Cocaine dependence with cocaine-induced anxiety disorder | ICD-10 |
| F14.281 | Cocaine dependence with cocaine-induced sexual dysfunction | ICD-10 |
| F14.282 | Cocaine dependence with cocaine-induced sleep disorder | ICD-10 |
| F14.288 | Cocaine dependence with other cocaine-induced disorder | ICD-10 |
| F14.29 | Cocaine dependence with unspecified cocaine-induced disorder | ICD-10 |
| F14.9 | Cocaine use, unspecified | ICD-10 |
| F14.90 | Cocaine use, unspecified, uncomplicated | ICD-10 |
| F14.91 | Cocaine use, unspecified, in remission | ICD-10 |
| F14.92 | Cocaine use, unspecified with intoxication | ICD-10 |
| F14.920 | Cocaine use, unspecified with intoxication, uncomplicated | ICD-10 |
| F14.921 | Cocaine use, unspecified with intoxication delirium | ICD-10 |
| F14.922 | Cocaine use, unspecified with intoxication with perceptual disturbance | ICD-10 |
| F14.929 | Cocaine use, unspecified with intoxication, unspecified | ICD-10 |
| F14.93 | Cocaine use, unspecified with withdrawal | ICD-10 |
| F14.94 | Cocaine use, unspecified with cocaine-induced mood disorder | ICD-10 |
| F14.95 | Cocaine use, unspecified with cocaine-induced psychotic disorder | ICD-10 |
| F14.950 | Cocaine use, unspecified with cocaine-induced psychotic disorder with delusions | ICD-10 |
| F14.951 | Cocaine use, unspecified with cocaine-induced psychotic disorder with hallucinations | ICD-10 |
| F14.959 | Cocaine use, unspecified with cocaine-induced psychotic disorder, unspecified | ICD-10 |
| F14.98 | Cocaine use, unspecified with other specified cocaine-induced disorder | ICD-10 |
| F14.980 | Cocaine use, unspecified with cocaine-induced anxiety disorder | ICD-10 |
| F14.981 | Cocaine use, unspecified with cocaine-induced sexual dysfunction | ICD-10 |
| F14.982 | Cocaine use, unspecified with cocaine-induced sleep disorder | ICD-10 |
| F14.988 | Cocaine use, unspecified with other cocaine-induced disorder | ICD-10 |
| F14.99 | Cocaine use, unspecified with unspecified cocaine-induced disorder | ICD-10 |
| 304.2 | Cocaine dependence | ICD-9 |
| 304.20 | Cocaine dependence, unspecified | ICD-9 |
| 304.21 | Cocaine dependence, continuous | ICD-9 |
| 304.22 | Cocaine dependence, episodic | ICD-9 |
| 304.23 | Cocaine dependence, in remission | ICD-9 |
| 305.6 | Cocaine abuse | ICD-9 |
| 305.60 | Cocaine abuse, unspecified | ICD-9 |
| 305.61 | Cocaine abuse, continuous | ICD-9 |
| 305.62 | Cocaine abuse, episodic | ICD-9 |
| 305.63 | Cocaine abuse, in remission | ICD-9 |
| Amphetamine and other stimulants | | |
| F15 | Other stimulant related disorders | ICD-10 |
| F15.1 | Other stimulant abuse | ICD-10 |
| F15.10 | Other stimulant abuse, uncomplicated | ICD-10 |
| F15.11 | Other stimulant abuse, in remission | ICD-10 |
| F15.12 | Other stimulant abuse with intoxication | ICD-10 |
| F15.120 | Other stimulant abuse with intoxication, uncomplicated | ICD-10 |
| F15.121 | Other stimulant abuse with intoxication delirium | ICD-10 |
| F15.122 | Other stimulant abuse with intoxication with perceptual disturbance | ICD-10 |
| F15.129 | Other stimulant abuse with intoxication, unspecified | ICD-10 |
| F15.13 | Other stimulant abuse with withdrawal | ICD-10 |
| F15.14 | Other stimulant abuse with stimulant-induced mood disorder | ICD-10 |
| F15.15 | Other stimulant abuse with stimulant-induced psychotic disorder | ICD-10 |
| F15.150 | Other stimulant abuse with stimulant-induced psychotic disorder with delusions | ICD-10 |
| F15.151 | Other stimulant abuse with stimulant-induced psychotic disorder with hallucinations | ICD-10 |
| F15.159 | Other stimulant abuse with stimulant-induced psychotic disorder, unspecified | ICD-10 |
| F15.18 | Other stimulant abuse with other stimulant-induced disorder | ICD-10 |
| F15.180 | Other stimulant abuse with stimulant-induced anxiety disorder | ICD-10 |
| F15.181 | Other stimulant abuse with stimulant-induced sexual dysfunction | ICD-10 |
| F15.182 | Other stimulant abuse with stimulant-induced sleep disorder | ICD-10 |
| F15.188 | Other stimulant abuse with other stimulant-induced disorder | ICD-10 |
| F15.19 | Other stimulant abuse with unspecified stimulant-induced disorder | ICD-10 |
| F15.2 | Other stimulant dependence | ICD-10 |
| F15.20 | Other stimulant dependence, uncomplicated | ICD-10 |
| F15.21 | Other stimulant dependence, in remission | ICD-10 |
| F15.22 | Other stimulant dependence with intoxication | ICD-10 |
| F15.220 | Other stimulant dependence with intoxication, uncomplicated | ICD-10 |
| F15.221 | Other stimulant dependence with intoxication delirium | ICD-10 |
| F15.222 | Other stimulant dependence with intoxication with perceptual disturbance | ICD-10 |
| F15.229 | Other stimulant dependence with intoxication, unspecified | ICD-10 |
| F15.23 | Other stimulant dependence with withdrawal | ICD-10 |
| F15.24 | Other stimulant dependence with stimulant-induced mood disorder | ICD-10 |
| F15.25 | Other stimulant dependence with stimulant-induced psychotic disorder | ICD-10 |
| F15.250 | Other stimulant dependence with stimulant-induced psychotic disorder with delusions | ICD-10 |
| F15.251 | Other stimulant dependence with stimulant-induced psychotic disorder with hallucinations | ICD-10 |
| F15.259 | Other stimulant dependence with stimulant-induced psychotic disorder, unspecified | ICD-10 |
| F15.28 | Other stimulant dependence with other stimulant-induced disorder | ICD-10 |
| F15.280 | Other stimulant dependence with stimulant-induced anxiety disorder | ICD-10 |
| F15.281 | Other stimulant dependence with stimulant-induced sexual dysfunction | ICD-10 |
| F15.282 | Other stimulant dependence with stimulant-induced sleep disorder | ICD-10 |
| F15.288 | Other stimulant dependence with other stimulant-induced disorder | ICD-10 |
| F15.29 | Other stimulant dependence with unspecified stimulant-induced disorder | ICD-10 |
| F15.9 | Other stimulant use, unspecified | ICD-10 |
| F15.90 | Other stimulant use, unspecified, uncomplicated | ICD-10 |
| F15.91 | Other stimulant use, unspecified, in remission | ICD-10 |
| F15.92 | Other stimulant use, unspecified with intoxication | ICD-10 |
| F15.920 | Other stimulant use, unspecified with intoxication, uncomplicated | ICD-10 |
| F15.921 | Other stimulant use, unspecified with intoxication delirium | ICD-10 |
| F15.922 | Other stimulant use, unspecified with intoxication with perceptual disturbance | ICD-10 |
| F15.929 | Other stimulant use, unspecified with intoxication, unspecified | ICD-10 |
| F15.93 | Other stimulant use, unspecified with withdrawal | ICD-10 |
| F15.94 | Other stimulant use, unspecified with stimulant-induced mood disorder | ICD-10 |
| F15.95 | Other stimulant use, unspecified with stimulant-induced psychotic disorder | ICD-10 |
| F15.950 | Other stimulant use, unspecified with stimulant-induced psychotic disorder with delusions | ICD-10 |
| F15.951 | Other stimulant use, unspecified with stimulant-induced psychotic disorder with hallucinations | ICD-10 |
| F15.959 | Other stimulant use, unspecified with stimulant-induced psychotic disorder, unspecified | ICD-10 |
| F15.98 | Other stimulant use, unspecified with other stimulant-induced disorder | ICD-10 |
| F15.980 | Other stimulant use, unspecified with stimulant-induced anxiety disorder | ICD-10 |
| F15.981 | Other stimulant use, unspecified with stimulant-induced sexual dysfunction | ICD-10 |
| F15.982 | Other stimulant use, unspecified with stimulant-induced sleep disorder | ICD-10 |
| F15.988 | Other stimulant use, unspecified with other stimulant-induced disorder | ICD-10 |
| F15.99 | Other stimulant use, unspecified with unspecified stimulant-induced disorder | ICD-10 |
| 304.4 | Amphetamine and other psychostimulant dependence | ICD-9 |
| 304.40 | Amphetamine and other psychostimulant dependence, unspecified | ICD-9 |
| 304.41 | Amphetamine and other psychostimulant dependence, continuous | ICD-9 |
| 304.42 | Amphetamine and other psychostimulant dependence, episodic | ICD-9 |
| 304.43 | Amphetamine and other psychostimulant dependence, in remission | ICD-9 |
| 305.7 | Amphetamine or related acting sympathomimetic abuse | ICD-9 |
| 305.70 | Amphetamine or related acting sympathomimetic abuse, unspecified | ICD-9 |
| 305.71 | Amphetamine or related acting sympathomimetic abuse, continuous | ICD-9 |
| 305.72 | Amphetamine or related acting sympathomimetic abuse, episodic | ICD-9 |
| 305.73 | Amphetamine or related acting sympathomimetic abuse, in remission | ICD-9 |
| Hallucinogens | | |
| F16 | Hallucinogen related disorders | ICD-10 |
| F16.1 | Hallucinogen abuse | ICD-10 |
| F16.10 | Hallucinogen abuse, uncomplicated | ICD-10 |
| F16.11 | Hallucinogen abuse, in remission | ICD-10 |
| F16.12 | Hallucinogen abuse with intoxication | ICD-10 |
| F16.120 | Hallucinogen abuse with intoxication, uncomplicated | ICD-10 |
| F16.121 | Hallucinogen abuse with intoxication with delirium | ICD-10 |
| F16.122 | Hallucinogen abuse with intoxication with perceptual disturbance | ICD-10 |
| F16.129 | Hallucinogen abuse with intoxication, unspecified | ICD-10 |
| F16.14 | Hallucinogen abuse with hallucinogen-induced mood disorder | ICD-10 |
| F16.15 | Hallucinogen abuse with hallucinogen-induced psychotic disorder | ICD-10 |
| F16.150 | Hallucinogen abuse with hallucinogen-induced psychotic disorder with delusions | ICD-10 |
| F16.151 | Hallucinogen abuse with hallucinogen-induced psychotic disorder with hallucinations | ICD-10 |
| F16.159 | Hallucinogen abuse with hallucinogen-induced psychotic disorder, unspecified | ICD-10 |
| F16.18 | Hallucinogen abuse with other hallucinogen-induced disorder | ICD-10 |
| F16.180 | Hallucinogen abuse with hallucinogen-induced anxiety disorder | ICD-10 |
| F16.183 | Hallucinogen abuse with hallucinogen persisting perception disorder (flashbacks) | ICD-10 |
| F16.188 | Hallucinogen abuse with other hallucinogen-induced disorder | ICD-10 |
| F16.19 | Hallucinogen abuse with unspecified hallucinogen-induced disorder | ICD-10 |
| F16.2 | Hallucinogen dependence | ICD-10 |
| F16.20 | Hallucinogen dependence, uncomplicated | ICD-10 |
| F16.21 | Hallucinogen dependence, in remission | ICD-10 |
| F16.22 | Hallucinogen dependence with intoxication | ICD-10 |
| F16.220 | Hallucinogen dependence with intoxication, uncomplicated | ICD-10 |
| F16.221 | Hallucinogen dependence with intoxication with delirium | ICD-10 |
| F16.229 | Hallucinogen dependence with intoxication, unspecified | ICD-10 |
| F16.24 | Hallucinogen dependence with hallucinogen-induced mood disorder | ICD-10 |
| F16.25 | Hallucinogen dependence with hallucinogen-induced psychotic disorder | ICD-10 |
| F16.250 | Hallucinogen dependence with hallucinogen-induced psychotic disorder with delusions | ICD-10 |
| F16.251 | Hallucinogen dependence with hallucinogen-induced psychotic disorder with hallucinations | ICD-10 |
| F16.259 | Hallucinogen dependence with hallucinogen-induced psychotic disorder, unspecified | ICD-10 |
| F16.28 | Hallucinogen dependence with other hallucinogen-induced disorder | ICD-10 |
| F16.280 | Hallucinogen dependence with hallucinogen-induced anxiety disorder | ICD-10 |
| F16.283 | Hallucinogen dependence with hallucinogen persisting perception disorder (flashbacks) | ICD-10 |
| F16.288 | Hallucinogen dependence with other hallucinogen-induced disorder | ICD-10 |
| F16.29 | Hallucinogen dependence with unspecified hallucinogen-induced disorder | ICD-10 |
| F16.9 | Hallucinogen use, unspecified | ICD-10 |
| F16.90 | Hallucinogen use, unspecified, uncomplicated | ICD-10 |
| F16.91 | Hallucinogen use, unspecified, in remission | ICD-10 |
| F16.92 | Hallucinogen use, unspecified with intoxication | ICD-10 |
| F16.920 | Hallucinogen use, unspecified with intoxication, uncomplicated | ICD-10 |
| F16.921 | Hallucinogen use, unspecified with intoxication with delirium | ICD-10 |
| F16.929 | Hallucinogen use, unspecified with intoxication, unspecified | ICD-10 |
| F16.94 | Hallucinogen use, unspecified with hallucinogen-induced mood disorder | ICD-10 |
| F16.95 | Hallucinogen use, unspecified with hallucinogen-induced psychotic disorder | ICD-10 |
| F16.950 | Hallucinogen use, unspecified with hallucinogen-induced psychotic disorder with delusions | ICD-10 |
| F16.951 | Hallucinogen use, unspecified with hallucinogen-induced psychotic disorder with hallucinations | ICD-10 |
| F16.959 | Hallucinogen use, unspecified with hallucinogen-induced psychotic disorder, unspecified | ICD-10 |
| F16.98 | Hallucinogen use, unspecified with other specified hallucinogen-induced disorder | ICD-10 |
| F16.980 | Hallucinogen use, unspecified with hallucinogen-induced anxiety disorder | ICD-10 |
| F16.983 | Hallucinogen use, unspecified with hallucinogen persisting perception disorder (flashbacks) | ICD-10 |
| F16.988 | Hallucinogen use, unspecified with other hallucinogen-induced disorder | ICD-10 |
| F16.99 | Hallucinogen use, unspecified with unspecified hallucinogen-induced disorder | ICD-10 |
| 304.5 | Hallucinogen dependence | ICD-9 |
| 304.50 | Hallucinogen dependence, unspecified | ICD-9 |
| 304.51 | Hallucinogen dependence, continuous | ICD-9 |
| 304.52 | Hallucinogen dependence, episodic | ICD-9 |
| 304.53 | Hallucinogen dependence, in remission | ICD-9 |
| 305.3 | Hallucinogen abuse | ICD-9 |
| 305.30 | Hallucinogen abuse, unspecified | ICD-9 |
| 305.31 | Hallucinogen abuse, continuous | ICD-9 |
| 305.32 | Hallucinogen abuse, episodic | ICD-9 |
| 305.33 | Hallucinogen abuse, in remission | ICD-9 |
| Alcohol | | |
| F10 | Alcohol related disorders | ICD-10 |
| F10.1 | Alcohol abuse | ICD-10 |
| F10.10 | Alcohol abuse, uncomplicated | ICD-10 |
| F10.11 | Alcohol abuse, in remission | ICD-10 |
| F10.12 | Alcohol abuse with intoxication | ICD-10 |
| F10.120 | Alcohol abuse with intoxication, uncomplicated | ICD-10 |
| F10.121 | Alcohol abuse with intoxication delirium | ICD-10 |
| F10.129 | Alcohol abuse with intoxication, unspecified | ICD-10 |
| F10.13 | Alcohol abuse, with withdrawal | ICD-10 |
| F10.130 | Alcohol abuse with withdrawal, uncomplicated | ICD-10 |
| F10.131 | Alcohol abuse with withdrawal delirium | ICD-10 |
| F10.132 | Alcohol abuse with withdrawal with perceptual disturbance | ICD-10 |
| F10.139 | Alcohol abuse with withdrawal, unspecified | ICD-10 |
| F10.14 | Alcohol abuse with alcohol-induced mood disorder | ICD-10 |
| F10.15 | Alcohol abuse with alcohol-induced psychotic disorder | ICD-10 |
| F10.150 | Alcohol abuse with alcohol-induced psychotic disorder with delusions | ICD-10 |
| F10.151 | Alcohol abuse with alcohol-induced psychotic disorder with hallucinations | ICD-10 |
| F10.159 | Alcohol abuse with alcohol-induced psychotic disorder, unspecified | ICD-10 |
| F10.18 | Alcohol abuse with other alcohol-induced disorders | ICD-10 |
| F10.180 | Alcohol abuse with alcohol-induced anxiety disorder | ICD-10 |
| F10.181 | Alcohol abuse with alcohol-induced sexual dysfunction | ICD-10 |
| F10.182 | Alcohol abuse with alcohol-induced sleep disorder | ICD-10 |
| F10.188 | Alcohol abuse with other alcohol-induced disorder | ICD-10 |
| F10.19 | Alcohol abuse with unspecified alcohol-induced disorder | ICD-10 |
| F10.2 | Alcohol dependence | ICD-10 |
| F10.20 | Alcohol dependence, uncomplicated | ICD-10 |
| F10.21 | Alcohol dependence, in remission | ICD-10 |
| F10.22 | Alcohol dependence with intoxication | ICD-10 |
| F10.220 | Alcohol dependence with intoxication, uncomplicated | ICD-10 |
| F10.221 | Alcohol dependence with intoxication delirium | ICD-10 |
| F10.229 | Alcohol dependence with intoxication, unspecified | ICD-10 |
| F10.23 | Alcohol dependence with withdrawal | ICD-10 |
| F10.230 | Alcohol dependence with withdrawal, uncomplicated | ICD-10 |
| F10.231 | Alcohol dependence with withdrawal delirium | ICD-10 |
| F10.232 | Alcohol dependence with withdrawal with perceptual disturbance | ICD-10 |
| F10.239 | Alcohol dependence with withdrawal, unspecified | ICD-10 |
| F10.24 | Alcohol dependence with alcohol-induced mood disorder | ICD-10 |
| F10.25 | Alcohol dependence with alcohol-induced psychotic disorder | ICD-10 |
| F10.250 | Alcohol dependence with alcohol-induced psychotic disorder with delusions | ICD-10 |
| F10.251 | Alcohol dependence with alcohol-induced psychotic disorder with hallucinations | ICD-10 |
| F10.259 | Alcohol dependence with alcohol-induced psychotic disorder, unspecified | ICD-10 |
| F10.26 | Alcohol dependence with alcohol-induced persisting amnestic disorder | ICD-10 |
| F10.27 | Alcohol dependence with alcohol-induced persisting dementia | ICD-10 |
| F10.28 | Alcohol dependence with other alcohol-induced disorders | ICD-10 |
| F10.280 | Alcohol dependence with alcohol-induced anxiety disorder | ICD-10 |
| F10.281 | Alcohol dependence with alcohol-induced sexual dysfunction | ICD-10 |
| F10.282 | Alcohol dependence with alcohol-induced sleep disorder | ICD-10 |
| F10.288 | Alcohol dependence with other alcohol-induced disorder | ICD-10 |
| F10.29 | Alcohol dependence with unspecified alcohol-induced disorder | ICD-10 |
| F10.9 | Alcohol use, unspecified | ICD-10 |
| F10.90 | Alcohol use, unspecified, uncomplicated | ICD-10 |
| F10.91 | Alcohol use, unspecified, in remission | ICD-10 |
| F10.92 | Alcohol use, unspecified with intoxication | ICD-10 |
| F10.920 | Alcohol use, unspecified with intoxication, uncomplicated | ICD-10 |
| F10.921 | Alcohol use, unspecified with intoxication delirium | ICD-10 |
| F10.929 | Alcohol use, unspecified with intoxication, unspecified | ICD-10 |
| F10.93 | Alcohol use, unspecified with withdrawal | ICD-10 |
| F10.930 | Alcohol use, unspecified with withdrawal, uncomplicated | ICD-10 |
| F10.931 | Alcohol use, unspecified with withdrawal delirium | ICD-10 |
| F10.932 | Alcohol use, unspecified with withdrawal with perceptual disturbance | ICD-10 |
| F10.939 | Alcohol use, unspecified with withdrawal, unspecified | ICD-10 |
| F10.94 | Alcohol use, unspecified with alcohol-induced mood disorder | ICD-10 |
| F10.95 | Alcohol use, unspecified with alcohol-induced psychotic disorder | ICD-10 |
| F10.950 | Alcohol use, unspecified with alcohol-induced psychotic disorder with delusions | ICD-10 |
| F10.951 | Alcohol use, unspecified with alcohol-induced psychotic disorder with hallucinations | ICD-10 |
| F10.959 | Alcohol use, unspecified with alcohol-induced psychotic disorder, unspecified | ICD-10 |
| F10.96 | Alcohol use, unspecified with alcohol-induced persisting amnestic disorder | ICD-10 |
| F10.97 | Alcohol use, unspecified with alcohol-induced persisting dementia | ICD-10 |
| F10.98 | Alcohol use, unspecified with other alcohol-induced disorders | ICD-10 |
| F10.980 | Alcohol use, unspecified with alcohol-induced anxiety disorder | ICD-10 |
| F10.981 | Alcohol use, unspecified with alcohol-induced sexual dysfunction | ICD-10 |
| F10.982 | Alcohol use, unspecified with alcohol-induced sleep disorder | ICD-10 |
| F10.988 | Alcohol use, unspecified with other alcohol-induced disorder | ICD-10 |
| F10.99 | Alcohol use, unspecified with unspecified alcohol-induced disorder | ICD-10 |
| 291 | Alcohol-induced mental disorders | ICD-9 |
| 291.0 | Alcohol withdrawal delirium | ICD-9 |
| 291.1 | Alcohol-induced persisting amnestic disorder | ICD-9 |
| 291.2 | Alcohol-induced persisting dementia | ICD-9 |
| 291.3 | Alcohol-induced psychotic disorder with hallucinations | ICD-9 |
| 291.4 | Idiosyncratic alcohol intoxication | ICD-9 |
| 291.5 | Alcohol-induced psychotic disorder with delusions | ICD-9 |
| 291.8 | Other specified alcohol-induced mental disorders | ICD-9 |
| 291.81 | Alcohol withdrawal | ICD-9 |
| 291.82 | Alcohol induced sleep disorders | ICD-9 |
| 291.89 | Other alcohol-induced mental disorders | ICD-9 |
| 291.9 | Unspecified alcohol-induced mental disorders | ICD-9 |
| 303 | Alcohol dependence syndrome | ICD-9 |
| 303.00 | Acute alcoholic intoxication in alcoholism, unspecified | ICD-9 |
| 303.01 | Acute alcoholic intoxication in alcoholism, continuous | ICD-9 |
| 303.02 | Acute alcoholic intoxication in alcoholism, episodic | ICD-9 |
| 303.03 | Acute alcoholic intoxication in alcoholism, in remission | ICD-9 |
| 303.9 | Other and unspecified alcohol dependence | ICD-9 |
| 303.90 | Other and unspecified alcohol dependence, unspecified | ICD-9 |
| 303.91 | Other and unspecified alcohol dependence, continuous | ICD-9 |
| 303.92 | Other and unspecified alcohol dependence, episodic | ICD-9 |
| 303.93 | Other and unspecified alcohol dependence, in remission | ICD-9 |
| 305.00 | Alcohol abuse, unspecified | ICD-9 |
| 305.01 | Alcohol abuse, continuous | ICD-9 |
| 305.02 | Alcohol abuse, episodic | ICD-9 |
| 305.03 | Alcohol abuse, in remission | ICD-9 |
| Inhalant / hypnotic / sedative / anxiolytic | | |
| F13 | Sedative, hypnotic, or anxiolytic related disorders | ICD-10 |
| F13.1 | Sedative, hypnotic or anxiolytic abuse | ICD-10 |
| F13.10 | Sedative, hypnotic or anxiolytic abuse, uncomplicated | ICD-10 |
| F13.11 | Sedative, hypnotic or anxiolytic abuse, in remission | ICD-10 |
| F13.12 | Sedative, hypnotic or anxiolytic abuse with intoxication | ICD-10 |
| F13.120 | Sedative, hypnotic or anxiolytic abuse with intoxication, uncomplicated | ICD-10 |
| F13.121 | Sedative, hypnotic or anxiolytic abuse with intoxication delirium | ICD-10 |
| F13.129 | Sedative, hypnotic or anxiolytic abuse with intoxication, unspecified | ICD-10 |
| F13.13 | Sedative, hypnotic or anxiolytic abuse with withdrawal | ICD-10 |
| F13.130 | Sedative, hypnotic or anxiolytic abuse with withdrawal, uncomplicated | ICD-10 |
| F13.131 | Sedative, hypnotic or anxiolytic abuse with withdrawal delirium | ICD-10 |
| F13.132 | Sedative, hypnotic or anxiolytic abuse with withdrawal with perceptual disturbance | ICD-10 |
| F13.139 | Sedative, hypnotic or anxiolytic abuse with withdrawal, unspecified | ICD-10 |
| F13.14 | Sedative, hypnotic or anxiolytic abuse with sedative, hypnotic or anxiolytic-induced mood disorder | ICD-10 |
| F13.15 | Sedative, hypnotic or anxiolytic abuse with sedative, hypnotic or anxiolytic-induced psychotic disorder | ICD-10 |
| F13.150 | Sedative, hypnotic or anxiolytic abuse with sedative, hypnotic or anxiolytic-induced psychotic disorder with delusions | ICD-10 |
| F13.151 | Sedative, hypnotic or anxiolytic abuse with sedative, hypnotic or anxiolytic-induced psychotic disorder with hallucinations | ICD-10 |
| F13.159 | Sedative, hypnotic or anxiolytic abuse with sedative, hypnotic or anxiolytic-induced psychotic disorder, unspecified | ICD-10 |
| F13.18 | Sedative, hypnotic or anxiolytic abuse with sedative, hypnotic or anxiolytic-induced disorders | ICD-10 |
| F13.180 | Sedative, hypnotic or anxiolytic abuse with sedative, hypnotic or anxiolytic-induced anxiety disorder | ICD-10 |
| F13.181 | Sedative, hypnotic or anxiolytic abuse with sedative, hypnotic or anxiolytic-induced sexual dysfunction | ICD-10 |
| F13.182 | Sedative, hypnotic or anxiolytic abuse with sedative, hypnotic or anxiolytic-induced sleep disorder | ICD-10 |
| F13.188 | Sedative, hypnotic or anxiolytic abuse with other sedative, hypnotic or anxiolytic-induced disorder | ICD-10 |
| F13.19 | Sedative, hypnotic or anxiolytic abuse with unspecified sedative, hypnotic or anxiolytic-induced disorder | ICD-10 |
| F13.2 | Sedative, hypnotic or anxiolytic dependence | ICD-10 |
| F13.20 | Sedative, hypnotic or anxiolytic dependence, uncomplicated | ICD-10 |
| F13.21 | Sedative, hypnotic or anxiolytic dependence, in remission | ICD-10 |
| F13.22 | Sedative, hypnotic or anxiolytic dependence with intoxication | ICD-10 |
| F13.220 | Sedative, hypnotic or anxiolytic dependence with intoxication, uncomplicated | ICD-10 |
| F13.221 | Sedative, hypnotic or anxiolytic dependence with intoxication delirium | ICD-10 |
| F13.229 | Sedative, hypnotic or anxiolytic dependence with intoxication, unspecified | ICD-10 |
| F13.23 | Sedative, hypnotic or anxiolytic dependence with withdrawal | ICD-10 |
| F13.230 | Sedative, hypnotic or anxiolytic dependence with withdrawal, uncomplicated | ICD-10 |
| F13.231 | Sedative, hypnotic or anxiolytic dependence with withdrawal delirium | ICD-10 |
| F13.232 | Sedative, hypnotic or anxiolytic dependence with withdrawal with perceptual disturbance | ICD-10 |
| F13.239 | Sedative, hypnotic or anxiolytic dependence with withdrawal, unspecified | ICD-10 |
| F13.24 | Sedative, hypnotic or anxiolytic dependence with sedative, hypnotic or anxiolytic-induced mood disorder | ICD-10 |
| F13.25 | Sedative, hypnotic or anxiolytic dependence with sedative, hypnotic or anxiolytic-induced psychotic disorder | ICD-10 |
| F13.250 | Sedative, hypnotic or anxiolytic dependence with sedative, hypnotic or anxiolytic-induced psychotic disorder with delusions | ICD-10 |
| F13.251 | Sedative, hypnotic or anxiolytic dependence with sedative, hypnotic or anxiolytic-induced psychotic disorder with hallucinations | ICD-10 |
| F13.259 | Sedative, hypnotic or anxiolytic dependence with sedative, hypnotic or anxiolytic-induced psychotic disorder, unspecified | ICD-10 |
| F13.26 | Sedative, hypnotic or anxiolytic dependence with sedative, hypnotic or anxiolytic-induced persisting amnestic disorder | ICD-10 |
| F13.27 | Sedative, hypnotic or anxiolytic dependence with sedative, hypnotic or anxiolytic-induced persisting dementia | ICD-10 |
| F13.28 | Sedative, hypnotic or anxiolytic dependence with other sedative, hypnotic or anxiolytic-induced disorders | ICD-10 |
| F13.280 | Sedative, hypnotic or anxiolytic dependence with sedative, hypnotic or anxiolytic-induced anxiety disorder | ICD-10 |
| F13.281 | Sedative, hypnotic or anxiolytic dependence with sedative, hypnotic or anxiolytic-induced sexual dysfunction | ICD-10 |
| F13.282 | Sedative, hypnotic or anxiolytic dependence with sedative, hypnotic or anxiolytic-induced sleep disorder | ICD-10 |
| F13.288 | Sedative, hypnotic or anxiolytic dependence with other sedative, hypnotic or anxiolytic-induced disorder | ICD-10 |
| F13.29 | Sedative, hypnotic or anxiolytic dependence with unspecified sedative, hypnotic or anxiolytic-induced disorder | ICD-10 |
| F13.9 | Sedative, hypnotic or anxiolytic-related use, unspecified | ICD-10 |
| F13.90 | Sedative, hypnotic or anxiolytic use, unspecified, uncomplicated | ICD-10 |
| F13.91 | Sedative, hypnotic or anxiolytic use, unspecified, in remission | ICD-10 |
| F13.92 | Sedative, hypnotic or anxiolytic use, unspecified with intoxication | ICD-10 |
| F13.920 | Sedative, hypnotic or anxiolytic use, unspecified with intoxication, uncomplicated | ICD-10 |
| F13.921 | Sedative, hypnotic or anxiolytic use, unspecified with intoxication delirium | ICD-10 |
| F13.929 | Sedative, hypnotic or anxiolytic use, unspecified with intoxication, unspecified | ICD-10 |
| F13.93 | Sedative, hypnotic or anxiolytic use, unspecified with withdrawal | ICD-10 |
| F13.930 | Sedative, hypnotic or anxiolytic use, unspecified with withdrawal, uncomplicated | ICD-10 |
| F13.931 | Sedative, hypnotic or anxiolytic use, unspecified with withdrawal delirium | ICD-10 |
| F13.932 | Sedative, hypnotic or anxiolytic use, unspecified with withdrawal with perceptual disturbances | ICD-10 |
| F13.939 | Sedative, hypnotic or anxiolytic use, unspecified with withdrawal, unspecified | ICD-10 |
| F13.94 | Sedative, hypnotic or anxiolytic use, unspecified with sedative, hypnotic or anxiolytic-induced mood disorder | ICD-10 |
| F13.95 | Sedative, hypnotic or anxiolytic use, unspecified with sedative, hypnotic or anxiolytic-induced psychotic disorder | ICD-10 |
| F13.950 | Sedative, hypnotic or anxiolytic use, unspecified with sedative, hypnotic or anxiolytic-induced psychotic disorder with delusions | ICD-10 |
| F13.951 | Sedative, hypnotic or anxiolytic use, unspecified with sedative, hypnotic or anxiolytic-induced psychotic disorder with hallucinations | ICD-10 |
| F13.959 | Sedative, hypnotic or anxiolytic use, unspecified with sedative, hypnotic or anxiolytic-induced psychotic disorder, unspecified | ICD-10 |
| F13.96 | Sedative, hypnotic or anxiolytic use, unspecified with sedative, hypnotic or anxiolytic-induced persisting amnestic disorder | ICD-10 |
| F13.97 | Sedative, hypnotic or anxiolytic use, unspecified with sedative, hypnotic or anxiolytic-induced persisting dementia | ICD-10 |
| F13.98 | Sedative, hypnotic or anxiolytic use, unspecified with other sedative, hypnotic or anxiolytic-induced disorders | ICD-10 |
| F13.980 | Sedative, hypnotic or anxiolytic use, unspecified with sedative, hypnotic or anxiolytic-induced anxiety disorder | ICD-10 |
| F13.981 | Sedative, hypnotic or anxiolytic use, unspecified with sedative, hypnotic or anxiolytic-induced sexual dysfunction | ICD-10 |
| F13.982 | Sedative, hypnotic or anxiolytic use, unspecified with sedative, hypnotic or anxiolytic-induced sleep disorder | ICD-10 |
| F13.988 | Sedative, hypnotic or anxiolytic use, unspecified with other sedative, hypnotic or anxiolytic-induced disorder | ICD-10 |
| F13.99 | Sedative, hypnotic or anxiolytic use, unspecified with unspecified sedative, hypnotic or anxiolytic-induced disorder | ICD-10 |
| F18 | Inhalant related disorders | ICD-10 |
| F18.1 | Inhalant abuse | ICD-10 |
| F18.10 | Inhalant abuse, uncomplicated | ICD-10 |
| F18.11 | Inhalant abuse, in remission | ICD-10 |
| F18.12 | Inhalant abuse with intoxication | ICD-10 |
| F18.120 | Inhalant abuse with intoxication, uncomplicated | ICD-10 |
| F18.121 | Inhalant abuse with intoxication delirium | ICD-10 |
| F18.129 | Inhalant abuse with intoxication, unspecified | ICD-10 |
| F18.14 | Inhalant abuse with inhalant-induced mood disorder | ICD-10 |
| F18.15 | Inhalant abuse with inhalant-induced psychotic disorder | ICD-10 |
| F18.150 | Inhalant abuse with inhalant-induced psychotic disorder with delusions | ICD-10 |
| F18.151 | Inhalant abuse with inhalant-induced psychotic disorder with hallucinations | ICD-10 |
| F18.159 | Inhalant abuse with inhalant-induced psychotic disorder, unspecified | ICD-10 |
| F18.17 | Inhalant abuse with inhalant-induced dementia | ICD-10 |
| F18.18 | Inhalant abuse with other inhalant-induced disorders | ICD-10 |
| F18.180 | Inhalant abuse with inhalant-induced anxiety disorder | ICD-10 |
| F18.188 | Inhalant abuse with other inhalant-induced disorder | ICD-10 |
| F18.19 | Inhalant abuse with unspecified inhalant-induced disorder | ICD-10 |
| F18.2 | Inhalant dependence | ICD-10 |
| F18.20 | Inhalant dependence, uncomplicated | ICD-10 |
| F18.21 | Inhalant dependence, in remission | ICD-10 |
| F18.22 | Inhalant dependence with intoxication | ICD-10 |
| F18.220 | Inhalant dependence with intoxication, uncomplicated | ICD-10 |
| F18.221 | Inhalant dependence with intoxication delirium | ICD-10 |
| F18.229 | Inhalant dependence with intoxication, unspecified | ICD-10 |
| F18.24 | Inhalant dependence with inhalant-induced mood disorder | ICD-10 |
| F18.25 | Inhalant dependence with inhalant-induced psychotic disorder | ICD-10 |
| F18.250 | Inhalant dependence with inhalant-induced psychotic disorder with delusions | ICD-10 |
| F18.251 | Inhalant dependence with inhalant-induced psychotic disorder with hallucinations | ICD-10 |
| F18.259 | Inhalant dependence with inhalant-induced psychotic disorder, unspecified | ICD-10 |
| F18.27 | Inhalant dependence with inhalant-induced dementia | ICD-10 |
| F18.28 | Inhalant dependence with other inhalant-induced disorders | ICD-10 |
| F18.280 | Inhalant dependence with inhalant-induced anxiety disorder | ICD-10 |
| F18.288 | Inhalant dependence with other inhalant-induced disorder | ICD-10 |
| F18.29 | Inhalant dependence with unspecified inhalant-induced disorder | ICD-10 |
| F18.9 | Inhalant use, unspecified | ICD-10 |
| F18.90 | Inhalant use, unspecified, uncomplicated | ICD-10 |
| F18.91 | Inhalant use, unspecified, in remission | ICD-10 |
| F18.92 | Inhalant use, unspecified with intoxication | ICD-10 |
| F18.920 | Inhalant use, unspecified with intoxication, uncomplicated | ICD-10 |
| F18.921 | Inhalant use, unspecified with intoxication with delirium | ICD-10 |
| F18.929 | Inhalant use, unspecified with intoxication, unspecified | ICD-10 |
| F18.94 | Inhalant use, unspecified with inhalant-induced mood disorder | ICD-10 |
| F18.95 | Inhalant use, unspecified with inhalant-induced psychotic disorder | ICD-10 |
| F18.950 | Inhalant use, unspecified with inhalant-induced psychotic disorder with delusions | ICD-10 |
| F18.951 | Inhalant use, unspecified with inhalant-induced psychotic disorder with hallucinations | ICD-10 |
| F18.959 | Inhalant use, unspecified with inhalant-induced psychotic disorder, unspecified | ICD-10 |
| F18.97 | Inhalant use, unspecified with inhalant-induced persisting dementia | ICD-10 |
| F18.98 | Inhalant use, unspecified with other inhalant-induced disorders | ICD-10 |
| F18.980 | Inhalant use, unspecified with inhalant-induced anxiety disorder | ICD-10 |
| F18.988 | Inhalant use, unspecified with other inhalant-induced disorder | ICD-10 |
| F18.99 | Inhalant use, unspecified with unspecified inhalant-induced disorder | ICD-10 |
| 304.1 | Sedative, hypnotic or anxiolytic dependence | ICD-9 |
| 304.10 | Sedative, hypnotic or anxiolytic dependence, unspecified | ICD-9 |
| 304.11 | Sedative, hypnotic or anxiolytic dependence, continuous | ICD-9 |
| 304.12 | Sedative, hypnotic or anxiolytic dependence, episodic | ICD-9 |
| 304.13 | Sedative, hypnotic or anxiolytic dependence, in remission | ICD-9 |
| 305.4 | Sedative, hypnotic or anxiolytic abuse | ICD-9 |
| 305.40 | Sedative, hypnotic or anxiolytic abuse, unspecified | ICD-9 |
| 305.41 | Sedative, hypnotic or anxiolytic abuse, continuous | ICD-9 |
| 305.42 | Sedative, hypnotic or anxiolytic abuse, episodic | ICD-9 |
| 305.43 | Sedative, hypnotic or anxiolytic abuse, in remission | ICD-9 |
| Nicotine | | |  |
| F17 | Nicotine dependence | ICD-10 |
| F17.2 | Nicotine dependence | ICD-10 |
| F17.20 | Nicotine dependence, unspecified | ICD-10 |
| F17.200 | Nicotine dependence, unspecified, uncomplicated | ICD-10 |
| F17.201 | Nicotine dependence, unspecified, in remission | ICD-10 |
| F17.203 | Nicotine dependence unspecified, with withdrawal | ICD-10 |
| F17.208 | Nicotine dependence, unspecified, with other nicotine-induced disorders | ICD-10 |
| F17.209 | Nicotine dependence, unspecified, with unspecified nicotine-induced disorders | ICD-10 |
| F17.21 | Nicotine dependence, cigarettes | ICD-10 |
| F17.210 | Nicotine dependence, cigarettes, uncomplicated | ICD-10 |
| F17.211 | Nicotine dependence, cigarettes, in remission | ICD-10 |
| F17.213 | Nicotine dependence, cigarettes, with withdrawal | ICD-10 |
| F17.218 | Nicotine dependence, cigarettes, with other nicotine-induced disorders | ICD-10 |
| F17.219 | Nicotine dependence, cigarettes, with unspecified nicotine-induced disorders | ICD-10 |
| F17.22 | Nicotine dependence, chewing tobacco | ICD-10 |
| F17.220 | Nicotine dependence, chewing tobacco, uncomplicated | ICD-10 |
| F17.221 | Nicotine dependence, chewing tobacco, in remission | ICD-10 |
| F17.223 | Nicotine dependence, chewing tobacco, with withdrawal | ICD-10 |
| F17.228 | Nicotine dependence, chewing tobacco, with other nicotine-induced disorders | ICD-10 |
| F17.229 | Nicotine dependence, chewing tobacco, with unspecified nicotine-induced disorders | ICD-10 |
| F17.29 | Nicotine dependence, other tobacco product | ICD-10 |
| F17.290 | Nicotine dependence, other tobacco product, uncomplicated | ICD-10 |
| F17.291 | Nicotine dependence, other tobacco product, in remission | ICD-10 |
| F17.293 | Nicotine dependence, unspecified | ICD-10 |
| F17.298 | Nicotine dependence, other tobacco product, with other nicotine-induced disorders | ICD-10 |
| F17.299 | Nicotine dependence, other tobacco product, with withdrawal | ICD-10 |
| 305.1 | Tobacco use disorder | ICD-9 |
| Polysubstance/other/unspecified substance misuse | | |  |
| F19 | Other psychoactive substance related disorders | ICD-10 |
| F19.1 | Other psychoactive substance abuse | ICD-10 |
| F19.10 | Other psychoactive substance abuse, uncomplicated | ICD-10 |
| F19.11 | Other psychoactive substance abuse, in remission | ICD-10 |
| F19.12 | Other psychoactive substance abuse with intoxication | ICD-10 |
| F19.120 | Other psychoactive substance abuse with intoxication, uncomplicated | ICD-10 |
| F19.121 | Other psychoactive substance abuse with intoxication delirium | ICD-10 |
| F19.122 | Other psychoactive substance abuse with intoxication with perceptual disturbances | ICD-10 |
| F19.129 | Other psychoactive substance abuse with intoxication, unspecified | ICD-10 |
| F19.13 | Other psychoactive substance abuse with withdrawal | ICD-10 |
| F19.130 | Other psychoactive substance abuse with withdrawal, uncomplicated | ICD-10 |
| F19.131 | Other psychoactive substance abuse with withdrawal delirium | ICD-10 |
| F19.132 | Other psychoactive substance abuse with withdrawal with perceptual disturbance | ICD-10 |
| F19.139 | Other psychoactive substance abuse with withdrawal, unspecified | ICD-10 |
| F19.14 | Other psychoactive substance abuse with psychoactive substance-induced mood disorder | ICD-10 |
| F19.15 | Other psychoactive substance abuse with psychoactive substance-induced psychotic disorder | ICD-10 |
| F19.150 | Other psychoactive substance abuse with psychoactive substance-induced psychotic disorder with delusions | ICD-10 |
| F19.151 | Other psychoactive substance abuse with psychoactive substance-induced psychotic disorder with hallucinations | ICD-10 |
| F19.159 | Other psychoactive substance abuse with psychoactive substance-induced psychotic disorder, unspecified | ICD-10 |
| F19.16 | Other psychoactive substance abuse with psychoactive substance-induced persisting amnestic disorder | ICD-10 |
| F19.17 | Other psychoactive substance abuse with psychoactive substance-induced persisting dementia | ICD-10 |
| F19.18 | Other psychoactive substance abuse with other psychoactive substance-induced disorders | ICD-10 |
| F19.180 | Other psychoactive substance abuse with psychoactive substance-induced anxiety disorder | ICD-10 |
| F19.181 | Other psychoactive substance abuse with psychoactive substance-induced sexual dysfunction | ICD-10 |
| F19.182 | Other psychoactive substance abuse with psychoactive substance-induced sleep disorder | ICD-10 |
| F19.188 | Other psychoactive substance abuse with other psychoactive substance-induced disorder | ICD-10 |
| F19.19 | Other psychoactive substance abuse with unspecified psychoactive substance-induced disorder | ICD-10 |
| F19.2 | Other psychoactive substance dependence | ICD-10 |
| F19.20 | Other psychoactive substance dependence, uncomplicated | ICD-10 |
| F19.21 | Other psychoactive substance dependence, in remission | ICD-10 |
| F19.22 | Other psychoactive substance dependence with intoxication | ICD-10 |
| F19.220 | Other psychoactive substance dependence with intoxication, uncomplicated | ICD-10 |
| F19.221 | Other psychoactive substance dependence with intoxication delirium | ICD-10 |
| F19.222 | Other psychoactive substance dependence with intoxication with perceptual disturbance | ICD-10 |
| F19.229 | Other psychoactive substance dependence with intoxication, unspecified | ICD-10 |
| F19.23 | Other psychoactive substance dependence with withdrawal | ICD-10 |
| F19.230 | Other psychoactive substance dependence with withdrawal, uncomplicated | ICD-10 |
| F19.231 | Other psychoactive substance dependence with withdrawal delirium | ICD-10 |
| F19.232 | Other psychoactive substance dependence with withdrawal with perceptual disturbance | ICD-10 |
| F19.239 | Other psychoactive substance dependence with withdrawal, unspecified | ICD-10 |
| F19.24 | Other psychoactive substance dependence with psychoactive substance-induced mood disorder | ICD-10 |
| F19.25 | Other psychoactive substance dependence with psychoactive substance-induced psychotic disorder | ICD-10 |
| F19.250 | Other psychoactive substance dependence with psychoactive substance-induced psychotic disorder with delusions | ICD-10 |
| F19.251 | Other psychoactive substance dependence with psychoactive substance-induced psychotic disorder with hallucinations | ICD-10 |
| F19.259 | Other psychoactive substance dependence with psychoactive substance-induced psychotic disorder, unspecified | ICD-10 |
| F19.26 | Other psychoactive substance dependence with psychoactive substance-induced persisting amnestic disorder | ICD-10 |
| F19.27 | Other psychoactive substance dependence with psychoactive substance-induced persisting dementia | ICD-10 |
| F19.28 | Other psychoactive substance dependence with other psychoactive substance-induced disorders | ICD-10 |
| F19.280 | Other psychoactive substance dependence with psychoactive substance-induced anxiety disorder | ICD-10 |
| F19.281 | Other psychoactive substance dependence with psychoactive substance-induced sexual dysfunction | ICD-10 |
| F19.282 | Other psychoactive substance dependence with psychoactive substance-induced sleep disorder | ICD-10 |
| F19.288 | Other psychoactive substance dependence with other psychoactive substance-induced disorder | ICD-10 |
| F19.29 | Other psychoactive substance dependence with unspecified psychoactive substance-induced disorder | ICD-10 |
| F19.9 | Other psychoactive substance use, unspecified | ICD-10 |
| F19.90 | Other psychoactive substance use, unspecified, uncomplicated | ICD-10 |
| F19.91 | Other psychoactive substance use, unspecified, in remission | ICD-10 |
| F19.92 | Other psychoactive substance use, unspecified with intoxication | ICD-10 |
| F19.920 | Other psychoactive substance use, unspecified with intoxication, uncomplicated | ICD-10 |
| F19.921 | Other psychoactive substance use, unspecified with intoxication with delirium | ICD-10 |
| F19.922 | Other psychoactive substance use, unspecified with intoxication with perceptual disturbance | ICD-10 |
| F19.929 | Other psychoactive substance use, unspecified with intoxication, unspecified | ICD-10 |
| F19.93 | Other psychoactive substance use, unspecified with withdrawal | ICD-10 |
| F19.930 | Other psychoactive substance use, unspecified with withdrawal, uncomplicated | ICD-10 |
| F19.931 | Other psychoactive substance use, unspecified with withdrawal delirium | ICD-10 |
| F19.932 | Other psychoactive substance use, unspecified with withdrawal with perceptual disturbance | ICD-10 |
| F19.939 | Other psychoactive substance use, unspecified with withdrawal, unspecified | ICD-10 |
| F19.94 | Other psychoactive substance use, unspecified with psychoactive substance-induced mood disorder | ICD-10 |
| F19.95 | Other psychoactive substance use, unspecified with psychoactive substance-induced psychotic disorder | ICD-10 |
| F19.950 | Other psychoactive substance use, unspecified with psychoactive substance-induced psychotic disorder with delusions | ICD-10 |
| F19.951 | Other psychoactive substance use, unspecified with psychoactive substance-induced psychotic disorder with hallucinations | ICD-10 |
| F19.959 | Other psychoactive substance use, unspecified with psychoactive substance-induced psychotic disorder, unspecified | ICD-10 |
| F19.96 | Other psychoactive substance use, unspecified with psychoactive substance-induced persisting amnestic disorder | ICD-10 |
| F19.97 | Other psychoactive substance use, unspecified with psychoactive substance-induced persisting dementia | ICD-10 |
| F19.98 | Other psychoactive substance use, unspecified with other psychoactive substance-induced disorders | ICD-10 |
| F19.980 | Other psychoactive substance use, unspecified with psychoactive substance-induced anxiety disorder | ICD-10 |
| F19.981 | Other psychoactive substance use, unspecified with psychoactive substance-induced sexual dysfunction | ICD-10 |
| F19.982 | Other psychoactive substance use, unspecified with psychoactive substance-induced sleep disorder | ICD-10 |
| F19.988 | Other psychoactive substance use, unspecified with other psychoactive substance-induced disorder | ICD-10 |
| F19.99 | Other psychoactive substance use, unspecified with unspecified psychoactive substance-induced disorder | ICD-10 |
| 292.89 | Other specified drug-induced mental disorders | ICD-9 |
| 292.9 | Unspecified drug-induced mental disorder | ICD-9 |
| 304.6 | Other specified drug dependence | ICD-9 |
| 304.60 | Other specified drug dependence, unspecified | ICD-9 |
| 304.61 | Other specified drug dependence, continuous | ICD-9 |
| 304.62 | Other specified drug dependence, episodic | ICD-9 |
| 304.63 | Other specified drug dependence, in remission | ICD-9 |
| 304.9 | Unspecified drug dependence | ICD-9 |
| 304.90 | Unspecified drug dependence, unspecified | ICD-9 |
| 304.91 | Unspecified drug dependence, continuous | ICD-9 |
| 304.92 | Unspecified drug dependence, episodic | ICD-9 |
| 304.93 | Unspecified drug dependence, in remission | ICD-9 |
| 305 | Nondependent abuse of drugs | ICD-9 |
| 305.9 | Other, mixed, or unspecified drug abuse | ICD-9 |
| 305.90 | Other, mixed, or unspecified drug abuse, unspecified | ICD-9 |
| 305.91 | Other, mixed, or unspecified drug abuse, continuous | ICD-9 |
| 305.92 | Other, mixed, or unspecified drug abuse, episodic | ICD-9 |
| 305.93 | Other, mixed, or unspecified drug abuse, in remission | ICD-9 |

**Supplementary Table 2.** Definition of psychiatric medication classes

| Medication class | Compound |
| --- | --- |
| Psychotropic medications | |
| Antipsychotic | First generation:  chlorpromazine, droperidol, fluphenazine,  haloperidol, loxapine, mesoridazine, molindone,  perphenazine, pimozide, prochlorperazine, reserpine, thioridazine, thiothixene, trifluoperazine, zuclopenthixol. |
| Second generation:  aripiprazole, aripiprazole lauroxil, asenapine, brexpiprazole, cariprazine, iloperidone, lumateperone, lurasidone, olanzapine, paliperidone, quetiapine, risperidone, ziprasidone, amisulpride, clozapine1. |
| Antidepressant | SSRI:  citalopram, escitalopram, fluoxetine, fluvoxamine, paroxetine, sertraline. |
| SNRI:  desvenlafaxine, duloxetine, levomilnacipran, milnacipran, reboxetine, venlafaxine. |
| Atypical:  bupropion, mirtazapine, agomelatine, mianserin. |
| Serotonin modulators:  nefazodone, trazodone, vilazodone, vortioxetine. |
| TCA:  amitriptyline, doxepin, desipramine, imipramine, nortriptyline, amoxapine, butriptyline, clomipramine, maprotiline, protriptyline, trimipramine, dothiepin (dosulepin), melitracen. |
| MAOI:  isocarboxazid, tranylcypromine, phenelzine, selegiline, moclobemide. |
| NMDA antagonists:  esketamine, ketamine. |
| Mood stabilizer | Carbamazepine, lamotrigine, gabapentin, topiramate, valproate, valproic acid, divalproex sodium. |
| Anxiolytic | Alprazolam, bromazepam, buspirone, chlordiazepoxide, clobazam, clorazepate, diazepam, halazepam, hydroxyzine, kava, lorazepam, meprobamate, oxazepam, prazepam, propranolol, diphenhydramine, clonazepam, pregabalin. |
| Anticonvulsant | Acetazolamide, brivaracetam, cannabidiol, carbamazepine, clobazam, clonazepam, diazepam, eslicarbazepine, ethosuximide, felbamate, fosphenytoin, lacosamide, levetiracetam, magnesium sulfate, mephenytoin, methsuximide, oxcarbazepine, perampanel, phenobarbital, phenytoin, pregabalin, primidone, rufinamide, stiripentol, tiagabine, trimethadione, vigabatrin, zonisamide. |
| Hypnotic or sedative | Amobarbital, butabarbital, chlormethiazole, dexmedetomidine, dichloralphenazone, doxylamine, estazolam, eszopiclone, ethchlorvynol, flurazepam, hexobarbital, lemborexant, melatonin, methyprylon, midazolam, nitrazepam, paraldehyde, pentobarbital, phenobarbital, quazepam, ramelteon, scopolamine, suvorexant, tasimelteon, temazepam, triazolam, valerian root extract, zaleplon, zolpidem, zopiclone. |

|  | **Study population  (n=756)** | **Sensitivity analysis population (n=739)** |
| --- | --- | --- |
| **Baseline GAD-7 score** |  |  |
| Mean (SD) | 13.6 (5.3) | 13.6 (5.3) |
| Median (Q1 – Q3) | 14.0 (10.0 - 18.0) | 14.0 (10.0 - 18.0) |
| **Follow-up GAD7 score** |  |  |
| Mean (SD) | 9.5 (5.8) | 9.5 (5.8) |
| Median (Q1 – Q3) | 9.0 (5.0 - 14.0) | 9.0 (5.0 - 14.0) |
| **Time from index to follow-up GAD-7** **assessment (days)** |  |  |
| Mean (SD) | 49.4 (16.1) | 49.5 (16.1) |
| Median (Q1 – Q3) | 44.0 (35.0 - 61.0) | 44.0 (35.0 - 61.0) |

**Supplementary Table 3.** GAD-7 score characteristics of the study population and the sensitivity analysis population

**Abbreviations:** Q, quartile; SD, standard deviation.

**Supplementary Table 4.** Sensitivity analysis:logistic regression analysis of the association between clinically meaningful improvement in GAD-7 and baseline demographic, clinical and treatment characteristics

| **Baseline variable** | **Univariate analysis** | | **Multivariable analysis** | |
| --- | --- | --- | --- | --- |
|  | **OR [95% CI]** | **P-value** | **OR (95% CI)** | **P-value** |
| **Demographic** |  |  |  |  |
| Age | 1.00 [0.99, 1.01] | 0.578 | 1.01 (0.99, 1.02) | 0.405 |
| Sex |  |  |  |  |
| Female | Reference | Reference |  |  |
| Male | 0.83 [0.58, 1.18] | 0.304 | 0.89 (0.60, 1.33) | 0.577 |
| Index year | 1.02 [0.94, 1.11] | 0.644 | 1.03 (0.94, 1.13) | 0.548 |
| Race |  |  |  |  |
| Black or African American | 1.08 [0.59, 1.96] | 0.806 | 0.63 (0.32, 1.22) | 0.170 |
| Other | 0.61 [0.39, 0.96] | 0.034 | 0.60 (0.36, 1.00) | 0.051 |
| White | Reference | Reference |  |  |
| Unknown | 0.88 [0.35, 2.20] | 0.787 | 0.74 (0.27, 2.01) | 0.549 |
| Region |  |  |  |  |
| Midwest | Reference | Reference |  |  |
| Northeast | 1.25 [0.68, 2.29] | 0.478 | 1.17 (0.58, 2.36) | 0.667 |
| South | 0.88 [0.60, 1.28] | 0.493 | 0.87 (0.55, 1.38) | 0.554 |
| West | 0.78 [0.57, 1.07] | 0.126 | 0.82 (0.55, 1.24) | 0.358 |
| Unknown | 1.56 [0.60, 4.08] | 0.362 | 1.27 (0.43, 3.79) | 0.668 |
| **Clinical** |  |  |  |  |
| Attention deficit hyperactivity disorder | 0.77 [0.41, 1.42] | 0.399 | 0.72 (0.36, 1.46) | 0.364 |
| Adjustment and stress-related disorders | 1.79 [0.59, 5.39] | 0.301 | 1.69 (0.49, 5.86) | 0.408 |
| Major depressive disorder | 0.84 [0.60, 1.17] | 0.302 | 0.71 (0.49, 1.05) | 0.086 |
| Obsessive–compulsive disorder | 0.36 [0.10, 1.38] | 0.137 | 0.59 (0.14, 2.51) | 0.473 |
| Other anxiety disorders | 0.86 [0.60, 1.22] | 0.396 | 0.89 (0.59, 1.34) | 0.577 |
| Personality disorders | 1.23 [0.33, 4.63] | 0.757 | 1.30 (0.29, 5.79) | 0.732 |
| Post-traumatic stress disorder | 0.80 [0.51, 1.25] | 0.319 | 0.91 (0.54, 1.53) | 0.711 |
| **GAD-7 score** | 5.49 [3.54, 8.50] | <0.001 | 6.74 (4.20, 10.81) | <0.001 |
| **Treatment** |  |  |  |  |
| Anticonvulsant | 0.54 [0.34, 0.88] | 0.014 | 0.64 (0.36, 1.15) | 0.135 |
| Antidepressant | 0.56 [0.40, 0.79] | 0.001 | 0.59 (0.40, 0.86) | 0.006 |
| Antipsychotic | 0.61 [0.38, 0.99] | 0.047 | 0.70 (0.40, 1.21) | 0.198 |
| Anxiolytic | 0.68 [0.50, 0.91] | 0.011 | 0.58 (0.40, 0.83) | 0.003 |
| Hypnotic or sedative | 1.03 [0.56, 1.88] | 0.924 | 1.55 (0.78, 3.05) | 0.208 |
| Mood stabilizer | 0.70 [0.46, 1.08] | 0.107 | 0.81 (0.50, 1.32) | 0.400 |
| Venlafaxine dose | 0.99 [0.98, 1.00] | 0.006 | 0.99 (0.98, 1.00) | 0.080 |

**Abbreviations:** CI, confidence interval; GAD-7, 7-item Generalized Anxiety Disorder Questionnaire; OR, odds ratio.

**Supplementary Figure 1.** Study design schematic. In addition, patients with psychiatric, neurodegenerative, or neurodevelopmental comorbidities, listed in Supplementary Table 1, +/-6 months around the index event were excluded.

**Supplementary Figure 2.** Odds ratio (OR) of clinically meaningful improvement in GAD-7 for each 1-point increase in baseline GAD-7 score.


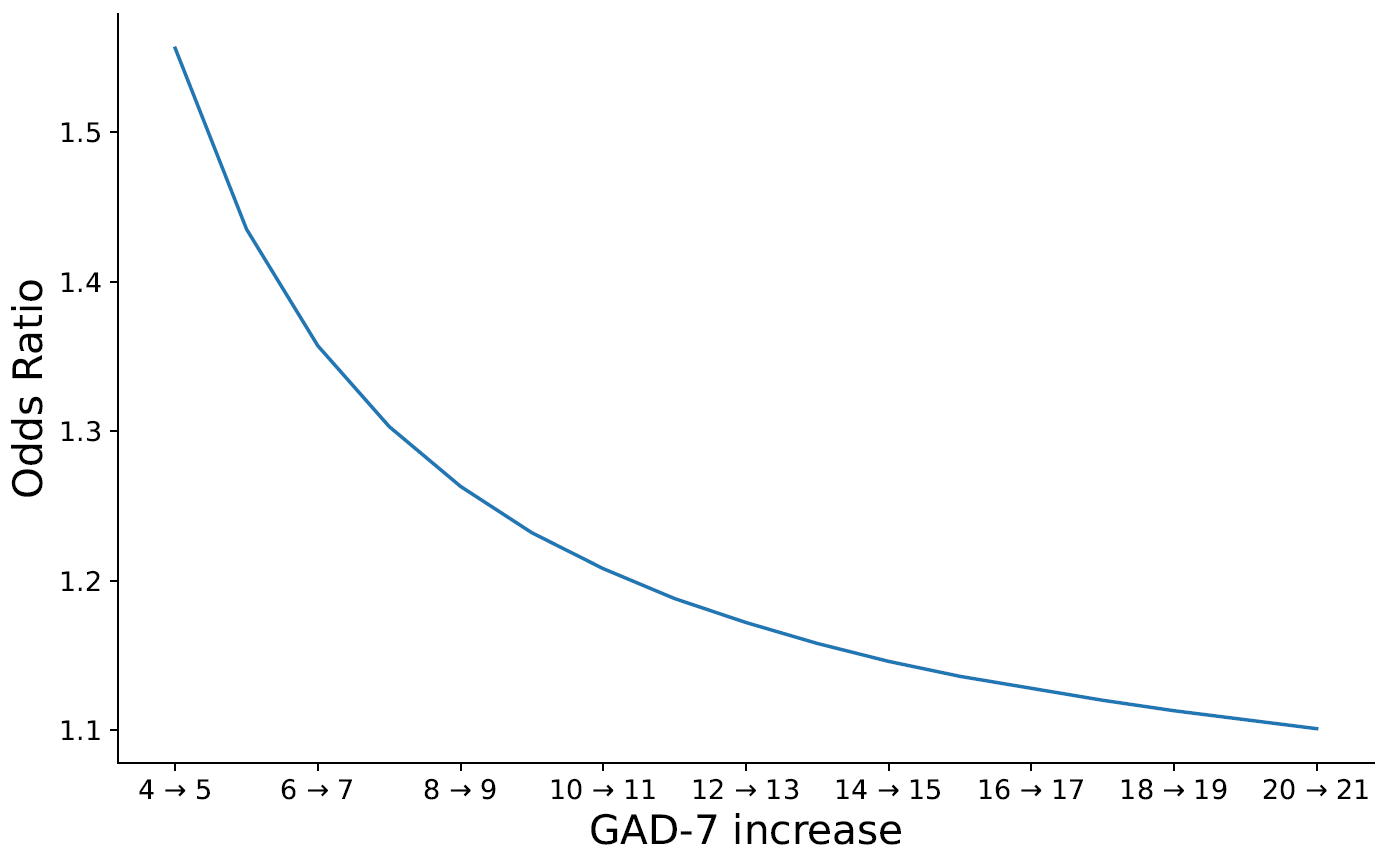

Supplement: Supplementary file 1 [file 608897%20Revised%20Supplementary%20Materials.docx]
